## RESEARCH ARTICLE

# Gata2 and Gata3 regulate the differentiation of serotonergic and glutamatergic neuron subtypes of the dorsal raphe

Maarja Haugas<sup>1,\*</sup>, Laura Tikker<sup>1,‡</sup>, Kaia Achim<sup>2</sup>, Marjo Salminen<sup>3</sup> and Juha Partanen<sup>1,§</sup>

## ABSTRACT

Serotonergic and glutamatergic neurons of the dorsal raphe regulate many brain functions and are important for mental health. Their functional diversity is based on molecularly distinct subtypes; however, the development of this heterogeneity is poorly understood. We show that the ventral neuroepithelium of mouse anterior hindbrain is divided into specific subdomains giving rise to serotonergic neurons as well as other types of neurons and glia. The newly born serotonergic precursors are segregated into distinct subpopulations expressing vesicular glutamate transporter 3 (*Vglut3*) or serotonin transporter (*Sert*). These populations differ in their requirements for transcription factors Gata2 and Gata3, which are activated in the post-mitotic precursors. Gata2 operates upstream of Gata3 as a cell fate selector in both populations, whereas Gata3 is important for the differentiation of the *Sert*<sup>+</sup> precursors and for the serotonergic identity of the *Vglut3*<sup>+</sup> precursors. Similar to the serotonergic neurons, the *Vglut3*-expressing glutamatergic neurons, located in the central dorsal raphe, are derived from neural progenitors in the ventral hindbrain and express *Pet1*. Furthermore, both Gata2 and Gata3 are redundantly required for their differentiation. Our study demonstrates lineage relationships of the dorsal raphe neurons and suggests that functionally significant heterogeneity of these neurons is established early during their differentiation.

**KEY WORDS:** Serotonergic neuron, Glutamatergic neuron, Dorsal raphe, Rhombomere 1, Gata2, Gata3

## INTRODUCTION

Serotonin modulates activity in essentially all regions of the brain, and imbalance in the serotonergic systems has been associated with complex psychiatric disorders including depression, anxiety, obsessive compulsive behaviour, impulsivity, autism and sleep disorders (Deneris and Wyler, 2012). Despite the wide range of functions, the source of serotonin in the brain is in relatively few serotonergic neurons. In the hindbrain, the serotonergic neurons form two main clusters – rostral and caudal (Dahlstroem and Fuxe, 1964; Alonso et al., 2013; Okaty et al., 2015). The rostral cluster includes subgroups of dorsal and median raphe nuclei and sends mostly ascending projections to the forebrain and midbrain,

modulating higher brain functions, whereas the caudal cluster has primarily descending connections to the spinal cord.

Recent studies have started to unravel molecular and functional heterogeneities among the serotonergic neurons. Transcriptome analyses have mapped the differences in gene expression between and within the rostral and caudal clusters (Wylie et al., 2010; Okaty et al., 2015). In addition, the dorsal and median raphe serotonergic neurons display heterogeneity in their serotonin autoreceptor (*Htr1a*) and serotonin transporter (*Sert*; also known as *Slc6a4*) expression, electrophysiological properties, axonal morphology and susceptibility to neurotoxins (Mamounas et al., 1991; Crawford et al., 2010; Calizo et al., 2011; Kiyasova et al., 2013). Serotonergic neurons in the dorsal raphe are also thought to differ in their use of co-neurotransmitters (Fu et al., 2010). These include glutamate as vesicular glutamate transporter 3 (*Vglut3*; *Slc17a8*) is produced in a subset of dorsal raphe serotonergic neurons (Hioki et al., 2010). In addition to the *Vglut3*<sup>+</sup> serotonergic neurons, a specific subgroup of non-serotonergic *Vglut3*<sup>+</sup> cells is located in the central dorsal raphe. Furthermore, recent studies demonstrated the importance of glutamatergic neurotransmission from the dorsal raphe to ventral tegmental area (VTA) in the regulation of motivation and reward processing (Hioki et al., 2010; Liu et al., 2014; McDevitt et al., 2014; Qi et al., 2014; Sego et al., 2014). Developmental mechanisms underlying the neuronal heterogeneity in the dorsal raphe are still poorly understood.

The serotonergic nuclei arise from different embryonic hindbrain segments (Cordes, 2005; Kiyasova and Gaspar, 2011; Deneris and Wyler, 2012). The dorsal raphe develops from a single anterior hindbrain segment, rhombomere 1 (r1), whereas the median raphe neurons originate from r1, r2 and r3 (Jensen et al., 2008). The serotonergic neurons develop adjacent to a ventral neuroepithelial region marked by a homeodomain (HD) transcription factor (TF) *Nkx2-2* (Briscoe et al., 1999). Misexpression of *Nkx2-2* in the dorsal r1 leads to induction of ectopic serotonergic neurons (Craven et al., 2004). However, *Nkx2-2* is not required for serotonergic neuron development in the r1 (Briscoe et al., 1999; Craven et al., 2004; Jensen et al., 2008). This has been suggested to be due to redundancy of *Nkx2-2* with a related TF, *Nkx2-9* (Briscoe et al., 1999; Pattyn et al., 2003). The r1 serotonergic progenitors express and require another HD TF, *Nkx6-1*, in the chicken (Craven et al., 2004; Deneris and Wyler, 2012). The proliferative serotonergic neuron progenitors also express *FoxA2*, as well as the proneural gene *Ascl1*, which are important for serotonergic neuron development (Pattyn et al., 2004; Norton et al., 2005; Jacob et al., 2007). However, it is unclear whether these TFs contribute to patterning of the ventral r1 progenitors to give rise to distinct serotonergic neuron subtypes.

Other TFs are activated and trigger the expression of a serotonergic neuron-specific gene battery after the cell cycle exit of the precursors. These include Gata2, Gata3, *Pet1*, *Lmx1b* and *Insm1* (Hendricks et al., 1999, 2003; van Doorninck et al., 1999;

<sup>1</sup>Department of Biosciences, P.O. Box 56, Viikinkaari 9, FIN00014-University of Helsinki, Helsinki, Finland. <sup>2</sup>EMBL Developmental Biology Unit, Meyerhofstrasse 1, Heidelberg 69117, Germany. <sup>3</sup>Department of Veterinary Biosciences, P.O. Box 66, Agnes Sjöbergin katu 2, FIN00014-University of Helsinki, Helsinki, Finland.

\*Present address: Institute of Biomedicine and Translational Medicine, University of Tartu, Ravila 14b, Tartu 50411, Estonia.

‡These authors contributed equally to this work

§Author for correspondence (juha.m.partanen@helsinki.fi)

 J.P., 0000-0001-8850-4825

Cheng et al., 2003; Ding et al., 2003; Craven et al., 2004; Pattyn et al., 2004; Jacob et al., 2009). In the r1, both *Gata2* and *Gata3* are expressed in GABAergic as well as serotonergic precursors. In contrast to the r1 GABAergic precursors, which retain *Gata3* expression in the absence of *Gata2*, *Gata3* expression is lost in the serotonergic precursors in *Gata2* mutant embryos (Kala et al., 2009). The expression of *Pet1*, *Lmx1b* and other functional serotonergic neuron markers are also absent from the *Gata2* mutant r1 (Craven et al., 2004; Kala et al., 2009). Consistently, *Gata2* directly regulates the expression of *Pet1*, a serotonergic neuron-specific TF that binds to regulatory regions of serotonergic gene battery, including *Tph2*, *Sert* and *Htr1a* (Krueger and Deneris, 2008). Thus, *Gata2* appears to be high in the gene regulatory hierarchy activated in the postmitotic serotonergic neuron precursors. In contrast to *Gata2*, inactivation of *Gata3* leads to a modest reduction in the numbers of serotonergic neurons in the perinatal anterior hindbrain (Pattyn et al., 2004; Liu et al., 2010).

Some observations indicate heterogeneity in the molecular regulation of development in the distinct populations of serotonergic neurons. For example, in *Pet1* mutants, about 30% of the serotonergic neurons are spared and the remaining neurons have distinct projection targets in the brain (Hendricks et al., 2003; Kiyasova et al., 2011). Thus, variation in the regulatory TFs during early development might translate into distinct subtypes of serotonergic neurons. However, the mechanisms underlying the cell type heterogeneity, especially within the individual raphe nuclei, remain unclear.

Here, we show that the neural cell populations derived from the ventral r1 give rise to the entire cell type complement in the dorsal raphe. We used genetic fate mapping to demonstrate that, in addition to some other types of neurons and glia, serotonergic precursors are derived from the *Nkx2-2*-expressing progenitors in the ventral r1. These serotonergic precursors are sorted into molecularly distinct subgroups from the earliest stages of their development, contribute to different serotonergic neuron subtypes of the dorsal raphe, and differ in their pattern of expression of *Gata2* and *Gata3*. We show by loss-of-function analyses that there are unique requirements for *Gata2* and *Gata3* in the development of the serotonergic neuron precursor populations. Finally, we show that the glutamatergic neurons of the dorsal raphe are developmentally related to serotonergic neurons.

## RESULTS

### Refined map of the progenitor domains in mouse ventral r1

Studies of *Nkx2-2* expression and function suggest that serotonergic neurons are derived from the *Nkx2-2*-positive progenitors in the ventral r1. To understand further the homeodomain TF codes and neuronal populations within the *Nkx2-2* domain, we compared the expression of *Nkx2-2*, *Nkx2-9*, *Nkx6-1* and *Nkx6-2* in the mouse ventral r1 at embryonic day (E) 10.5–E12.5. *Nkx2-9* has been suggested to cooperate with *Nkx2-2* to pattern the serotonergic progenitors (Briscoe et al., 1999). We observed expression of *Nkx2-9* in a narrow area in the dorsal *Nkx2-2*<sup>+</sup> domain, thus dividing the *Nkx2-2* progenitors into two domains, which we named rp3 and rpvMN (rhombencephalic progenitor domain 3 and rhombencephalic visceral motor neuron progenitor domain, respectively; nomenclature adopted from the spinal cord) (Fig. 1A–C,E–G) (Briscoe et al., 2000; Lahti et al., 2016). In chicken, *Nkx6-1* is expressed in serotonergic neuron progenitors and can induce serotonergic neuron differentiation cooperatively with *Nkx2-2* (Craven et al., 2004). We observed expression of *Nkx6-1* in E10.5–E12.5 mouse rp3 and rpvMN but, in contrast to

chicken embryos, in which strong *Nkx6-1* expression was associated with serotonergic neurogenesis, the level of *Nkx6-1* expression was low in the mouse serotonergic rp3 domain compared with the GABAergic/glutamatergic rp2 domain, especially at E11.5–E12.5 (Fig. 1I–K; Fig. S7B,E) (Lahti et al., 2016). Interestingly, the level of *Nkx6-1* expression in the rp3 progenitors appeared to be graded, increasing towards the dorsal boundary of the *Nkx2-2* expression. We also mapped the expression of a related TF, *Nkx6-2*, along the progenitor domains in the ventral r1. Similar to *Nkx6-1*, *Nkx6-2* displayed a dorsally increasing gradient, but its expression was more restricted to rpvMN and dorsal rp3 (Fig. S1A–C).

We next used genetic fate mapping in combination with known cell type markers to characterise further the cell lineages arising from the rp3 and rpvMN progenitor domains positive for *Nkx2-2*. At E10.5–E11.5, precursors expressing the motor neuron marker *Islet1* were detected adjacent to both rp3 and rpvMN domains in the anterior r1 (Fig. 1M,N; data not shown). In the *Nkx2-2*<sup>Cre</sup>; *ROSA26*<sup>TdTomato</sup> mice, in which Cre-mediated recombination in *Nkx2-2*-expressing cells permanently labels them with RFP expression, some *Islet1*-positive cells were RFP positive at E10.5 (Fig. 1Q,Q'). However, *Nkx2-2*<sup>Cre</sup> appeared to mediate only a mosaic recombination as 20% and 7% of the *Nkx2-2*-positive progenitors lacked RFP expression at E10.5 and E12.5, respectively (Fig. 1Q, arrow; data not shown). Nevertheless, we can conclude that at least some *Islet1*-positive cells are generated in the *Nkx2-2* domain. Although the activity of the *Nkx2-2* locus-driven Cre recombinase may not be early, strong or broad enough to label all *Islet1*-expressing precursors, we cannot exclude the possibility that some of the *Islet1*<sup>+</sup> cells are born outside the *Nkx2-2* domain. Similar to E10.5, mosaic recombination by the *Nkx2-2*<sup>Cre</sup> was detected in *Islet1*<sup>+</sup> trochlear neurons at E18.5 (data not shown).

At E12.5, serotonergic neuron markers 5-hydroxytryptamine (5-HT) and *Pet1* were detected adjacent to the *Nkx2-2*-positive progenitors, consistent with earlier studies (Fig. 1D; Fig. 5A,I). Furthermore, the *Pet1*-expressing precursors were efficiently labelled by RFP in *Nkx2-2*<sup>Cre</sup>; *ROSA26*<sup>TdTomato</sup> embryos at E12.5, demonstrating their origin in the *Nkx2-2*-expressing progenitors (Fig. 1S,S'). Interestingly, only the *Nkx2-2*<sup>+</sup>*Nkx2-9*<sup>−</sup> rp3 region appeared to give rise to serotonergic precursors. Instead, next to the adjacent *Nkx2-2*<sup>+</sup>*Nkx2-9*<sup>+</sup> rpvMN, we observed precursors expressing oligodendrocyte markers *Olig2*, *Sox10* and *Pdgfra* (Fig. 1H,O; data not shown). This oligodendrocyte population was also labelled in the *Nkx2-2*<sup>Cre</sup>; *ROSA26*<sup>TdTomato</sup> embryos, supporting their origin from the *Nkx2-2*-positive progenitors (Fig. 1R,R'), consistent with earlier studies in more posterior rhombomeres (Vallstedt et al., 2005). The *Nkx2-2* domain was bordered by the rp2 region, which gives rise to GABAergic and glutamatergic neurons (Fig. 1L,P) (Lahti et al., 2016).

Thus, we find that the progenitors in the ventral r1 can be divided into smaller subdomains that generate different neural cell types, including serotonergic neurons and oligodendrocytes. The results of our TF expression analysis and genetic fate mapping are summarised in Fig. 1T.

### Post-mitotic serotonergic neuron subtypes are segregated early in development

In the adult brain, functionally and molecularly different serotonergic neuron subgroups can be distinguished by the expression of *Vglut3* and *Sert* (Hioki et al., 2010). To understand when and how this diversity is established, we first analysed *Vglut3* and *Sert* expression in comparison with the broadly expressed early



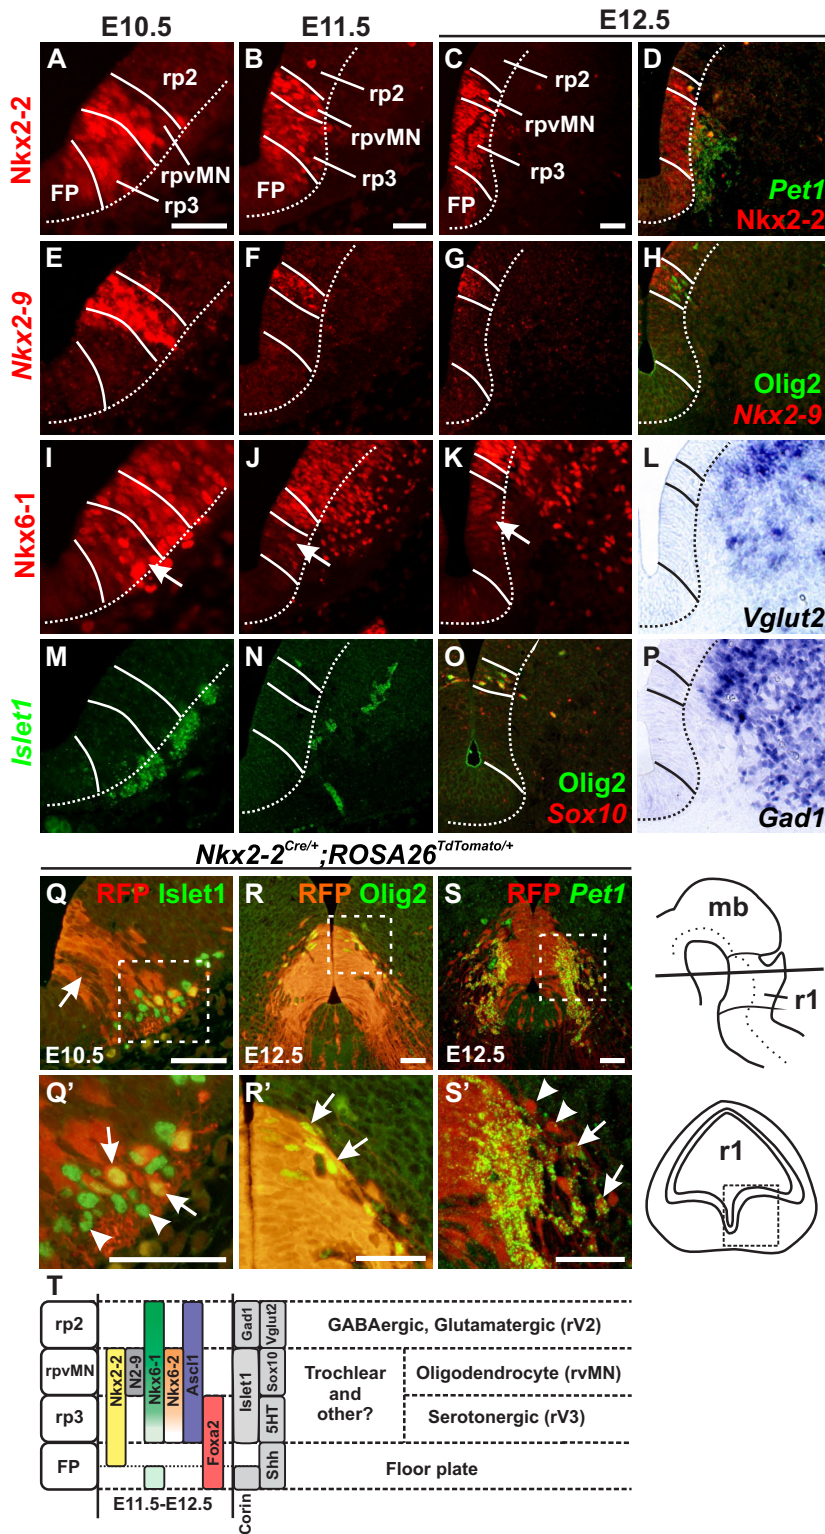

**Fig. 1. Progenitor domains producing neuronal variety in the ventral r1.** (A–C) Nkx2-2 IHC on ventral r1 at E10.5–E12.5 (sectioning plane shown bottom right). (D) Nkx2-2 IHC and *Pet1* ISH. (E–G) *Nkx2-9* ISH on sections parallel to those in A–C. (H) *Nkx2-9* ISH and Olig2 IHC. (I–K) Nkx6-1 IHC at E10.5–E12.5; arrows indicate graded expression in rp3. (L) *Vglut2* ISH. (M,N) *Islet1* ISH on sections parallel to those in A,B. (O) *Sox10* ISH and Olig2 IHC. (P) *Gad1* ISH. (Q–S') Sections of *Nkx2-2<sup>Cre/+</sup>;ROSA26<sup>TdTomato/+</sup>* embryos. (Q,Q') RFP and *Islet1* IHC on ventral r1 at E10.5; boxed region in Q is shown at higher magnification in Q'. Arrow in Q indicates mosaic expression of RFP among progenitors. Arrows in Q' mark RFP+ *Islet1*+ cells, arrowheads mark cells that express *Islet1* but not RFP. (R,R') RFP and Olig2 IHC at E12.5; boxed region in R is shown at higher magnification in R'. Arrows mark RFP+Olig2+ cells. (S,S') RFP IHC and *Pet1* ISH at E12.5; boxed region in S is shown at higher magnification in S'. Arrows indicate RFP+ *Pet1*+ cells, arrowheads indicate RFP+ *Pet1*- cells. (T) Ventral r1 progenitor domains producing different types of neural progeny. Many of the TFs shown are important for serotonergic neuron development in the mouse r1 or posterior rhombomeres (Briscoe et al., 1999; Pattyn et al., 2004; Jacob et al., 2007; Jensen et al., 2008). FP, floor plate; mb, midbrain; rV2,3, rhombencephalic V2, V3 precursor domain; rvMN, rhombencephalic vMN precursor domain. Scale bars: 50  $\mu$ m.

serotonergic marker *Pet1*. Interestingly, the expression of *Vglut3* and *Sert* was already segregated to discrete dorsal and ventral populations, respectively, of *Pet1*+ precursors at E11.5–E12.5 (Fig. 2A–D; Fig. S2A–D). Separate *Vglut3*- and *Sert*-expressing populations were also observed in different parts of the dorsal and median raphe complex later in embryonic development at E14.5, E16.5 and E18.5 as well as in the adult brain (Fig. 2F–L; Fig. S2E–S). However, at E16.5, E18.5 and in the adult dorsal raphe, some cells

were also found to co-express these markers, especially in the medial part of the dorsal raphe (Fig. 2F,E,H,J,K,M). *Sert*+ precursors apparently produce only serotonergic neurons, whereas the *Vglut3*+ precursors may give rise to either *Vglut3*+ serotonergic neurons using glutamate as a co-neurotransmitter or *Vglut3*+ glutamatergic neurons lacking serotonin biosynthesis (Hioki et al., 2010). From E11.5 onwards, some of the *Vglut3*+ cells also expressed *Tph2*, showing that at least some of them become

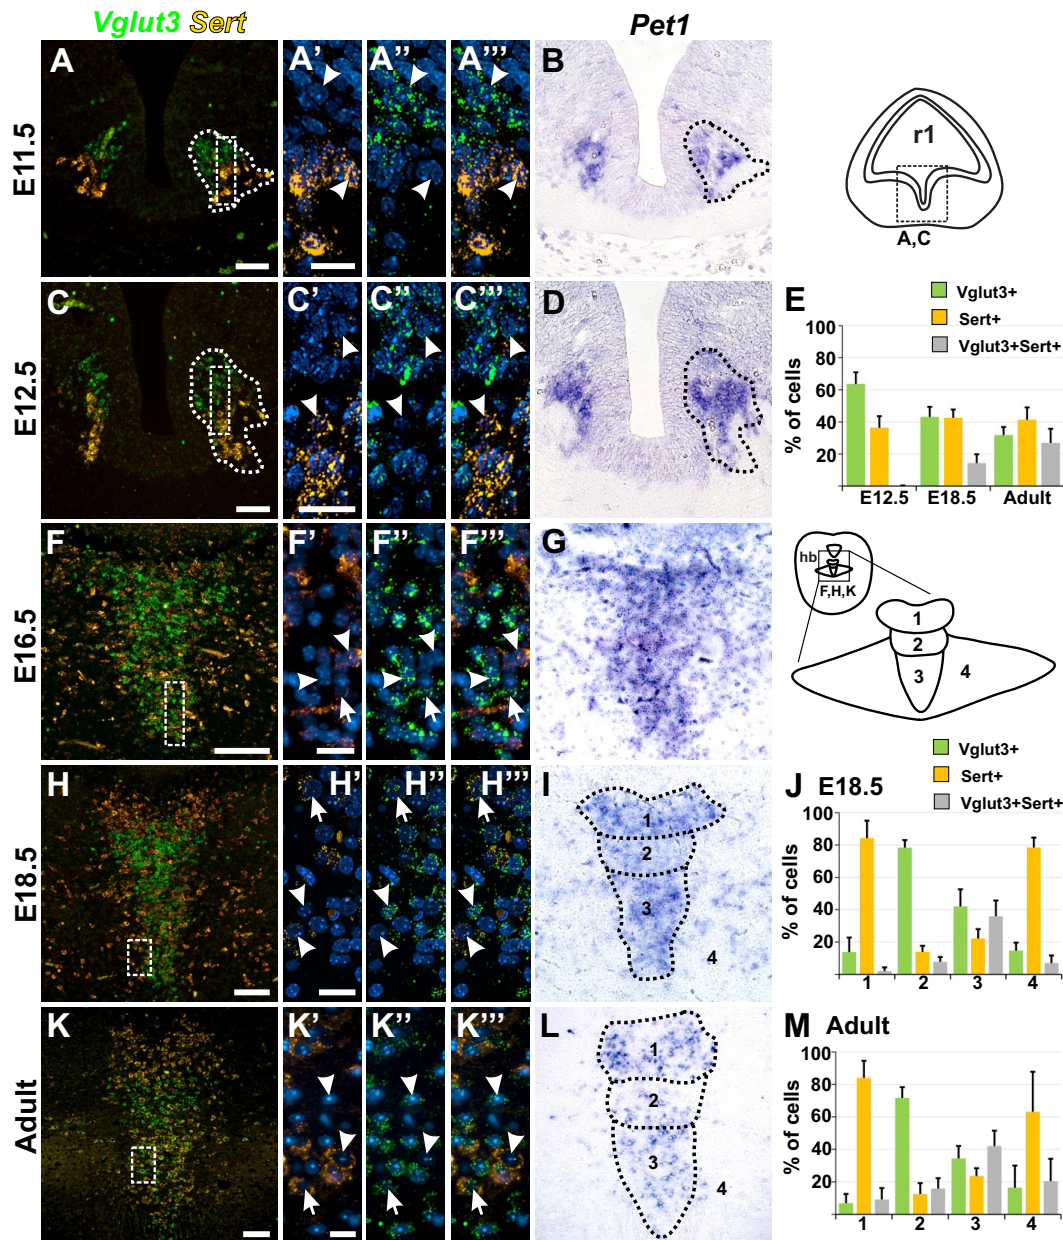

**Fig. 2.** *Vglut3*- and *Sert*-expressing populations in the developing and adult dorsal raphe. (A–A'', C–C'', F–F'', H–H'', K–K'') Combined *Vglut3* and *Sert* ISH at E11.5, E12.5, E16.5 and E18.5 and in an adult brain; boxed regions are shown at higher magnification in A'–A'', C'–C'', F'–F'', H'–H'', K'–K''. Arrows indicate double-positive, arrowheads single-positive cells. (B, D, G, I, L) *Pet1* ISH on sections parallel to those in A, C, F, H, K. (E, J, M) Relative amounts of *Vglut3*<sup>+</sup>, *Sert*<sup>+</sup> and *Vglut3*<sup>+</sup>*Sert*<sup>+</sup> cells at E12.5, E18.5 and in the adult, and their regional distribution in the dorsal raphe at E18.5 and in the adult. Regions analysed are indicated in the schematics and in I, L. *Pet1*-expressing area is outlined in A–D. Bars show mean±s.d. hb, hindbrain. Scale bars: 20 μm (a'–k'), 50 μm (A, C), 100 μm (F, H, K).

serotonergic (Fig. S3A–C). In summary, our results suggest that *Vglut3* and *Sert* are expressed in largely complementary subgroups of *Pet1*<sup>+</sup> post-mitotic precursors in the early stage of their differentiation. Later, neurons in the dorsal raphe express either *Sert* or *Vglut3* or both of them. These subtypes are differently distributed in the dorsal raphe complex.

Because we had observed graded expression of *Nkx6-1* and *Nkx6-2* along the serotonergic progenitor domain (Fig. 1I–K; Fig. S1A–C), we investigated whether this heterogeneity correlated with the above-mentioned cell types. Indeed, *Vglut3*-expressing precursors were located mostly next to the dorsal rp3 progenitors that are positive for *Nkx6-1* and *Nkx6-2*, whereas *Sert* expression was detected more ventrally (Fig. 3A, B; data not shown). Thus,

although the low level of *Nkx6-1* and *Nkx6-2* expression makes outlining of the exact rp3 subregions difficult, their expression in the progenitors spatially correlates with the development of distinct *Vglut3*<sup>+</sup> and *Sert*<sup>+</sup> precursor populations.

#### Expression of *Gata2* and *Gata3* during serotonergic neuron differentiation

*Gata2* and *Gata3* are important regulators of the development of serotonergic neurons and are differentially required in the rostral and caudal serotonergic neuron complexes (van Doorninck et al., 1999; Pattyn et al., 2004). To understand whether previously uncharacterised heterogeneity in *Gata* TF expression correlates with the development of the serotonergic neuron subgroups within the r1,



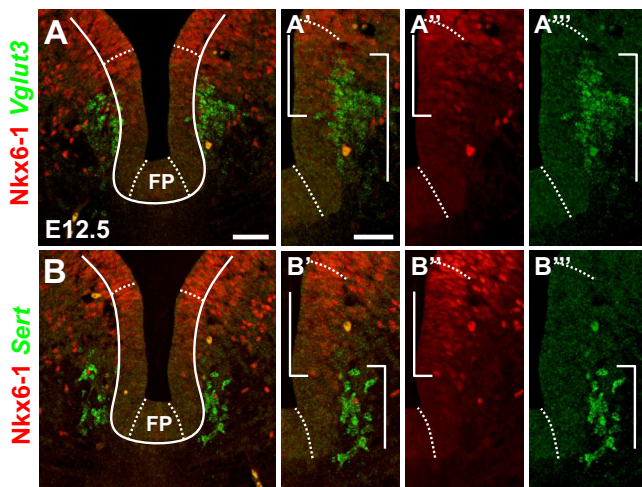

**Fig. 3. Comparison of Nkx6-1 expression in the rp3 progenitors to the *Vglut3*<sup>+</sup> and *Sert*<sup>+</sup> precursors.** (A–A''') *Vglut3* ISH and Nkx6-1 IHC at E12.5; higher magnifications shown in A'–A'''. (B) *Sert* ISH and Nkx6-1 IHC at E12.5; higher magnifications shown in B'–B'''. Dotted lines mark Nkx2-2 expression range on parallel sections (not shown). Brackets indicate expression area of analysed genes. FP, floor plate. Scale bars: 50 µm.

we analysed the expression of Gata2 and Gata3 in the *Vglut3*<sup>+</sup> and *Sert*<sup>+</sup> precursor populations. In the rp3, Gata2 and Gata3 were first detected at E10.5 when serotonergic neuron precursors start exiting the cell cycle (Fig. S4A–I). At E12.5, Gata2 and Gata3 were broadly expressed in the ventral r1 including the serotonergic precursors (Fig. 4A–A'''). However, we also observed some differences in the staining intensities of Gata2 and Gata3 along the *Vglut3*- and *Sert*-expressing precursor populations. Whereas Gata3 was detected in both subgroups at approximately the same intensity, Gata2 expression seemed stronger in the early *Vglut3*<sup>+</sup> precursors compared with the *Sert*<sup>+</sup> precursors (Fig. 4B'–E'''). In the dorsal raphe at E16.5, cells were heterogeneous for Gata2 and Gata3 expression and included all Gata2<sup>+</sup>, Gata3<sup>+</sup> and Gata2<sup>+</sup>Gata3<sup>+</sup> subtypes. However, we detected both of these factors in both *Vglut3*<sup>+</sup> and *Sert*<sup>+</sup> subgroups (Fig. 4F–J'''). Thus, although early in development the *Vglut3*<sup>+</sup> and *Sert*<sup>+</sup> serotonergic precursors show differences in the relative amounts of Gata2 and Gata3 expression, both cell types express them later in the dorsal raphe.

#### **Gata2 is not required for the production of neuronal precursors but is necessary for activation of serotonergic neuron-specific gene expression**

Although Gata TFs, especially Gata2, are known to be involved in the development of serotonergic neurons, their exact role in this process is still unclear, largely owing to early embryonic lethality of *Gata2* and *Gata3* null mutant mice (Bresnick et al., 2010). To analyse the functions of Gata2 and Gata3 in serotonergic neuron development in the r1, we conditionally inactivated *Gata2* (*Gata2*<sup>fllox</sup> allele) and *Gata3* (*Gata3*<sup>fllox</sup>) using the *En1*<sup>Cre</sup> allele, which drives efficient Cre-mediated recombination in the midbrain and r1 as early as E8.5 (Trokovic et al., 2003). We detected no Gata2 or Gata3 expression in *En1*<sup>Cre</sup>;*Gata2*<sup>fllox/fllox</sup> (*Gata2*<sup>En1cko</sup>) or *En1*<sup>Cre</sup>;*Gata3*<sup>fllox/fllox</sup> (*Gata3*<sup>En1cko</sup>) embryos, respectively, at E11.5–E12.5 (Fig. S4J–S).

First, we investigated whether Gata2 is required for the production or survival of post-mitotic serotonergic neuron precursors. We observed no apparent changes in the expression of postmitotic neuron markers [Tuj1 (also known as Tubb3) and HuC/D (also

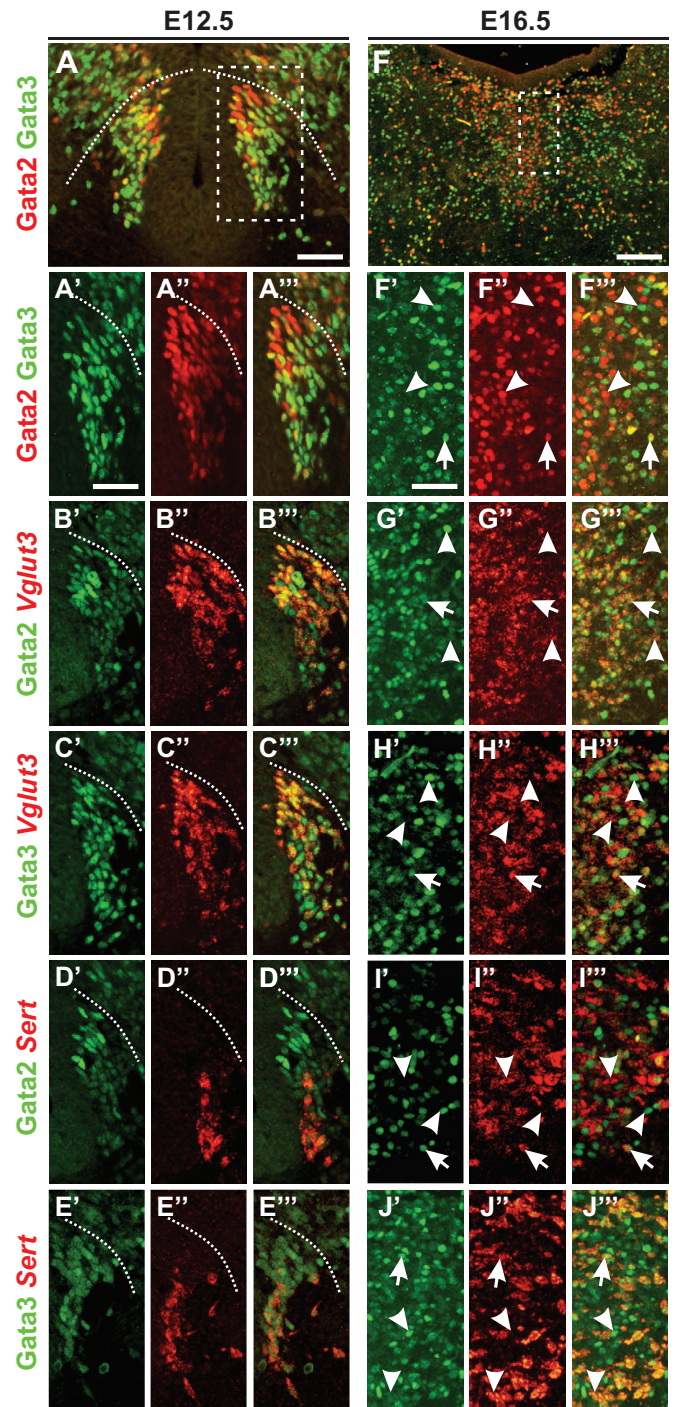

**Fig. 4. Gata2 and Gata3 expression in *Vglut3*<sup>+</sup> and *Sert*<sup>+</sup> precursors.** (A–A''', F–F''') Gata2 and Gata3 IHC at E12.5 and E16.5; boxed regions are shown at higher magnification in A'–A''', F'–F'''. (B'–B''', G'–G''') Gata2 IHC and *Vglut3* ISH. (C'–C''', H'–H''') Gata3 IHC and *Vglut3* ISH. (D'–D''', I'–I''') Gata2 IHC and *Sert* ISH. (E'–E''', J'–J''') Gata3 IHC and *Sert* ISH. Arrows indicate co-expression and arrowheads single-positive cells. Dotted lines indicate the dorsal border of Nkx2-2 expression on a parallel section. Scale bars: 50 µm (A, A', F'); 100 µm (F).

known as Elavl3/4)], number of apoptotic cells or morphological appearance of the E12.5 ventral r1 of *Gata2*<sup>En1cko</sup> mutants compared with controls (Fig. S5A–F). However, the post-mitotic precursors produced in the Nkx2-2 domain of *Gata2*<sup>En1cko</sup> embryos had lost both general and subtype-specific aspects of the serotonergic neuron



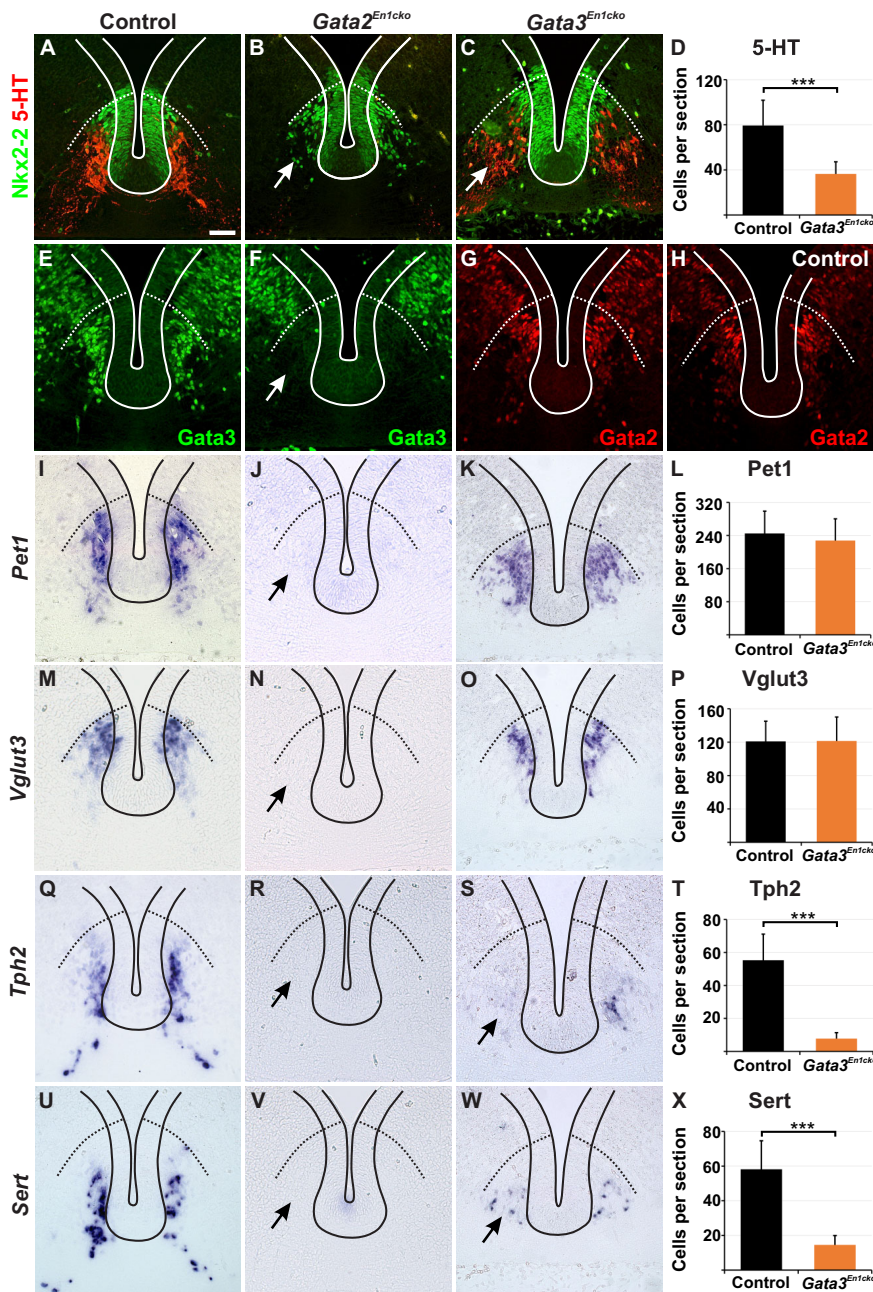

**Fig. 5. Defective serotonergic neuron development in *Gata2<sup>En1cko</sup>* and *Gata3<sup>En1cko</sup>* at E12.5.** (A–C) Nkx2-2 and 5-HT IHC. (E, F) Gata3 IHC. (G, H) Gata2 IHC. (I–K, M–O, Q–S, U–W) *Pet1*, *Vglut3*, *Tph2* and *Sert* ISH. (D, L, P, T, X) Quantification of 5-HT-, *Pet1*-, *Vglut3*-, *Tph2*- and *Sert*-positive cells in control and *Gata3<sup>En1cko</sup>* embryos. Bars represent mean  $\pm$  s.d. \*\*\* $P < 0.001$  (two-tailed Student's *t*-test). Arrows indicate defective activation of serotonergic markers in *Gata2<sup>En1cko</sup>* and *Gata3<sup>En1cko</sup>*. Dotted lines mark borders between domains rpVmn and rp3. Scale bar: 50  $\mu$ m.

phenotype, as we detected no expression of 5-HT, Gata3, *Pet1*, *Tph2*, *Vglut3* or *Sert* in them (Fig. 5B, F, J, N, R, V). As the *En1<sup>Cre</sup>* allele drives recombination throughout the midbrain and r1, we investigated whether a more specific inactivation of *Gata2* in the ventral r1 using the *Nkx2-2<sup>Cre</sup>* allele also leads to defective serotonergic neuron development. Similar to the *Gata2<sup>En1cko</sup>* mutants, the expression of 5-HT, *Vglut3* and *Sert* was absent or greatly reduced in the *Nkx2-2<sup>Cre</sup>; Gata2<sup>fllox/fllox</sup>* embryos at E12.5 (Fig. S6A–H). Few remaining serotonergic neurons were detected at E18.5 (Fig. S6I–N). These remain probably because of incomplete/late recombination by the *Nkx2-2<sup>Cre</sup>* (Fig. S6E, F, H, arrowheads). Thus, the failure in serotonergic neuron differentiation in the *Gata2<sup>En1cko</sup>* embryos is likely to be due to an intrinsic *Gata2* function in the precursors derived from the *Nkx2-2<sup>+</sup>* progenitors.

Using cDNA microarrays, we further profiled gene expression changes between the wild-type and *Gata2<sup>En1cko</sup>* basal r1 at E12.5 and identified additional gene products downregulated in the

*Gata2<sup>En1cko</sup>* (Table 1). Gene ontology analyses and comparisons with published serotonergic neuron transcriptomes (Okaty et al., 2015) revealed that the genes downregulated in the *Gata2<sup>En1cko</sup>* embryos included many that were expressed in serotonergic neurons and important for their function (Table S3). We validated and complemented these results by *in situ* mRNA hybridisation (ISH) experiments. All serotonergic neuron-specific genes we analysed were downregulated in the ventral r1 of E12.5 *Gata2<sup>En1cko</sup>* embryos (Table 1; data not shown). Some of the genes we analysed by ISH were also expressed in the r1 outside the serotonergic domain. This probably explains why they were not detected among the downregulated transcripts in the cDNA microarray profiling.

Taken together, our data support the hypothesis that *Gata2* acts at the top of the gene regulatory hierarchy in the post-mitotic precursors of the ventral r1, leading to the differentiation and development of the serotonergic phenotype of both *Vglut3*- and *Sert*-expressing serotonergic neuron subtypes.

**Table 1. Genes downregulated in *Gata2*<sup>En1cko</sup> and *Gata3*<sup>En1cko</sup> at E12.5**

| Symbol               | Microarray ( <i>Gata2</i> <sup>En1cko</sup> compared with wild type) |                           | ISH (serotonergic neurons)     |                                |
|----------------------|----------------------------------------------------------------------|---------------------------|--------------------------------|--------------------------------|
|                      | Fold change                                                          | Adjusted <i>P</i> -value* | <i>Gata2</i> <sup>En1cko</sup> | <i>Gata3</i> <sup>En1cko</sup> |
| <i>Tph2</i>          | -15.597                                                              | 1.175e-06                 | -                              | -                              |
| <i>Cryba2</i>        | -8.243                                                               | 1.015e-05                 | -                              | +                              |
| <i>Sert</i>          | -7.29                                                                | 1.175e-06                 | -                              | -                              |
| <i>Vglut3</i>        | -6.52                                                                | 7.963e-05                 | -                              | +                              |
| <i>Gfpt1</i>         | -5.481                                                               | 2.311e-07                 | n.a.                           | n.a.                           |
| <i>Gchfr</i>         | -3.348                                                               | 0.0004288                 | n.a.                           | n.a.                           |
| <i>Scg2</i>          | -2.702                                                               | 2.885e-05                 | -                              | n.a.                           |
| <i>Chgb</i>          | -2.271                                                               | 0.003697                  | n.a.                           | n.a.                           |
| <i>Pet1</i>          | -1.96                                                                | 0.002909                  | -                              | +                              |
| <i>Nt5c3</i>         | -1.863                                                               | 0.007053                  | n.a.                           | n.a.                           |
| <i>Syt1</i>          | -1.815                                                               | 0.007955                  | n.a.                           | n.a.                           |
| <i>Csnk2a1</i>       | -1.761                                                               | 0.005796                  | n.a.                           | n.a.                           |
| <i>Mad (Mxd1)</i>    | -1.75                                                                | 0.0004881                 | n.a.                           | n.a.                           |
| <i>Adamts9</i>       | -1.709                                                               | 0.003697                  | n.a.                           | n.a.                           |
| <i>Gprin2</i>        | -1.667                                                               | 0.004920                  | n.a.                           | n.a.                           |
| <i>Ddc</i>           | -1.66                                                                | 0.02700                   | -                              | +                              |
| <i>Gch1</i>          | -1.583                                                               | 0.02518                   | n.a.                           | n.a.                           |
| <i>Akap9</i>         | -1.543                                                               | 0.01969                   | n.a.                           | n.a.                           |
| <i>C130021I20Rik</i> | -1.54                                                                | 0.02570                   | n.a.                           | n.a.                           |
| <i>Ehmt1</i>         | -1.504                                                               | 0.03558                   | n.a.                           | n.a.                           |
| <i>Gata2</i>         | n.d.                                                                 |                           | -                              | +                              |
| <i>Gata3</i>         | n.d.                                                                 |                           | -                              | -                              |
| <i>Lmx1b</i>         | n.d.                                                                 |                           | -                              | +                              |
| <i>Foxp1</i>         | n.d.                                                                 |                           | -                              | n.a.                           |
| <i>Vmat2</i>         | n.d.                                                                 |                           | -                              | +                              |
| ( <i>Slc18a2</i> )   |                                                                      |                           |                                |                                |
| <i>Uncx</i>          | n.d.                                                                 |                           | -                              | n.a.                           |

\*Genes with *P*<0.05 shown.

-, lost/reduced expression; +, expression not changed; n.a., not analysed; n.d., not detected.

### ***Gata2* directs r1 neuronal precursors to a serotonergic fate in preference to alternative fates**

We then investigated whether the neuronal precursors in the ventral r1 had adopted a different neuronal phenotype in the absence of *Gata2* gene function. These phenotypes might correspond to the ones taken by neuronal precursors derived from the rp3, rpMN or other ventral r1 domains (Fig. 1). Indeed, concomitant with the loss of the serotonergic neuron markers, we found ectopic induction of *Islet1* (*Isl1*) and *Vglut2* (*Slc17a6*) expression in the ventral r1 of E12.5 *Gata2*<sup>En1cko</sup> embryos (Fig. 6B,D,M). Moreover, the expression of *Nkx6-1*, which is mostly confined to the proliferative progenitors in the wild type, was maintained or re-activated in the post-mitotic precursors in the *Gata2*<sup>En1cko</sup> embryos (Fig. 6G; Fig. S7E). Interestingly, the precursors derived from different *Nkx2-2* subdomains adopted distinct phenotypes in the *Gata2*<sup>En1cko</sup> mutants: we observed upregulation of *Islet1* primarily in the dorsal precursors, but *Vglut2* in the ventral precursors (Fig. 6; data not shown).

Notably, despite the induction of *Islet1*, a motor neuron marker, we observed no ectopic expression of general cholinergic markers [ChAT, VACHT (*Slc18a3*)] or markers of trochlear (*Phox2b*, *Phox2a*), visceral (*Tbx20*) or somatic [HB9 (*Mnx1*)] motor neurons in *Gata2*<sup>En1cko</sup> mutants at E12.5–E18.5 (data not shown). To gain further insight into the enigmatic phenotype adopted by the ventral r1 precursors in *Gata2*<sup>En1cko</sup> embryos, we analysed genes for which expression was upregulated in the *Gata2*<sup>En1cko</sup> embryos in our microarray-based gene-expression analyses (Table 2). One of these, cocaine and amphetamine-regulated transcript (*Cart*),

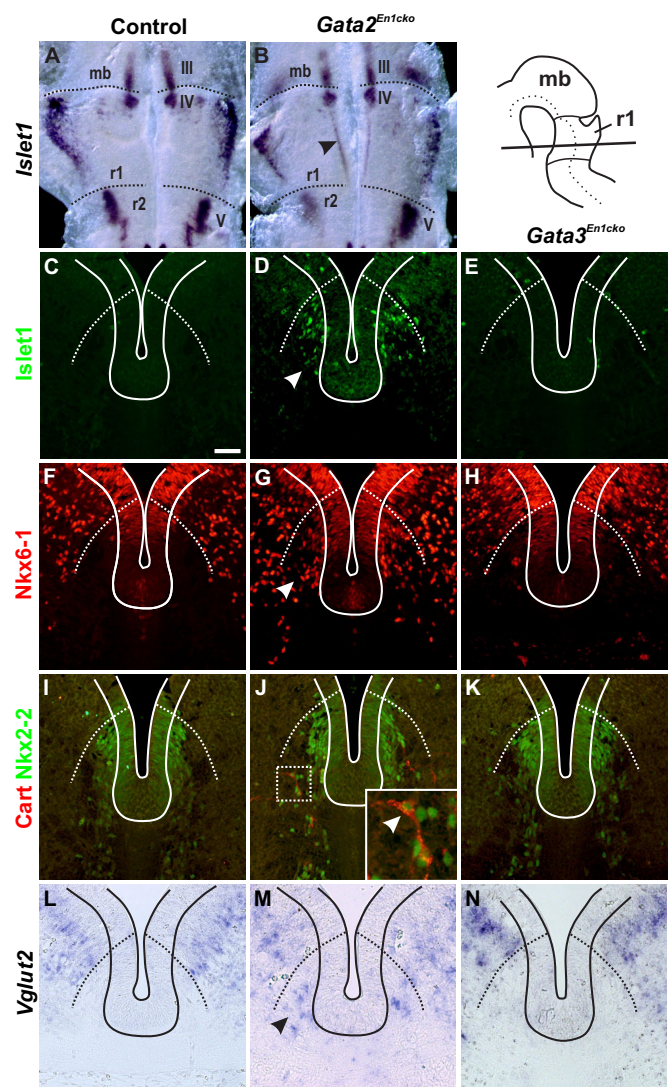

**Fig. 6. Transformation of the serotonergic precursor identity in *Gata2*<sup>En1cko</sup>.** (A,B) *Islet1* whole-mount ISH at E12.5. Dotted lines indicate midbrain-r1 and r1-r2 borders. (C–E) *Islet1* IHC. (F–H) *Nkx6-1* IHC. (I–K) *Cart* and *Nkx2-2* IHC. (L–N) *Vglut2* ISH. Arrowheads indicate ectopic expression in the *Gata2*<sup>En1cko</sup> post-mitotic precursors. Dotted lines in C–N mark the rp3–rpvMN border. In J, boxed area is shown at higher magnification in the inset. Schematic indicates level of section shown in C–N. mb, midbrain; III, oculomotor nucleus; IV, trochlear nucleus; V, trigeminal nucleus. Scale bar: 50 μm.

encoding for a neuropeptide expressed in the centrally projecting preEdinger–Westphal nucleus located near the ventral midline of the midbrain (Kozicz et al., 2011), was indeed ectopically expressed in some cells of *Gata2*<sup>En1cko</sup> ventral r1 at E12.5 (Fig. 6J). These *Cart*<sup>+</sup> cells also expressed *Nkx6-1* but most of them did not express *Islet1* or *Vglut2* (Fig. S8A–C).

We then investigated whether the transformed neural precursors contributed to nuclei in the brain. Ectopic *Islet1*<sup>+</sup> and *Cart*<sup>+</sup> neurons were detected in the *Gata2*<sup>En1cko</sup> ventral r1 at E13.5 and E14.5 (data not shown). However, we did not find increased numbers or ectopic *Islet1*<sup>+</sup>, *Nkx6-1*<sup>+</sup> or *Cart*<sup>+</sup> neurons in the preEdinger–Westphal nucleus or in the r1 area at E18.5 (Fig. S8D–K; data not shown). The fate of ectopic *Vglut2*<sup>+</sup> cells remains unclear as *Vglut2* is widely expressed in the ventral r1 at later stages of development and other population-specific markers are lacking. Aside from *Islet1*, *Nkx6-1*, *Vglut2* and *Cart*, we observed no upregulation of dopaminergic (Th)



**Table 2. Genes upregulated in *Gata2*<sup>En1cko</sup> at E12.5**

| Symbol        | Microarray ( <i>Gata2</i> <sup>En1cko</sup> compared with wild type) |                           |
|---------------|----------------------------------------------------------------------|---------------------------|
|               | Fold change                                                          | Adjusted <i>P</i> -value* |
| <i>Pkd2l1</i> | 1.616                                                                | 0.0043                    |
| <i>Acta2</i>  | 1.558                                                                | 0.018                     |
| <i>Metrn</i>  | 1.631                                                                | 0.022                     |
| <i>Cart</i>   | 1.676                                                                | 0.036                     |

\*Genes with *P*<0.05 shown.

or GABAergic (*Gad1*) neuron markers, nor ectopic expression of *Sim1*, a gene expressed in the analogous ventral V3 domain of the spinal cord, in the *Gata2*<sup>En1cko</sup> r1. The expression of *Olig2* was also still restricted to cells adjacent to the *Nkx2-9*<sup>+</sup> region (Fig. S9).

Thus, in the absence of *Gata2*, the postmitotic precursors produced in the ventral r1 might switch their phenotype from serotonergic to other neuronal identities. These new identities remain largely unclear, but include precursors transiently expressing *Islet1*, precursors resembling the neurons found in the nearby preEdinger–Westphal nucleus, as well as precursors of *Vglut2*<sup>+</sup> glutamatergic neurons.

### Distinct requirements for *Gata2* and *Gata3* in subpopulations of serotonergic precursors

Downstream of *Gata2*, *Gata3* may belong to the general transcriptional regulatory cascade leading to full activation of serotonergic neuron gene battery. However, these two *Gata* factors also showed differences in their relative expression in the serotonergic neuron subgroups (see above). To understand better the specific functions of *Gata3* in serotonergic neuron development in the r1, we analysed *Gata3*<sup>En1cko</sup> embryos and compared them with the *Gata2* loss-of-function phenotype.

In contrast to the *Gata2*<sup>En1cko</sup> mutants and consistent with earlier reports (Pattyn et al., 2004), we observed 5-HT-positive serotonergic precursors in *Gata3*<sup>En1cko</sup> embryos at E12.5, albeit in severely reduced numbers compared with the wild type (Fig. 5C,D). Expression analyses of genes characteristic for serotonergic neurons suggested that *Gata3* is required for the expression of only a subset of these markers, as we observed a noticeable downregulation of *Tph2* and *Sert*, but not *Gata2*, *Pet1* or *Vglut3* in the *Gata3*<sup>En1cko</sup> embryos (Fig. 5G,K,L,O,P,S,T,W,X; Table 1). In contrast to the *Gata2*<sup>En1cko</sup>, we did not observe upregulation of *Islet1*, *Nkx6-1*, *Cart* or *Vglut2* in *Gata3*<sup>En1cko</sup> ventral r1 precursors (Fig. 6E,H,K,N).

We then investigated how the developmental defects impact the cell type distribution in the dorsal and median raphe complexes in *Gata2*<sup>En1cko</sup> and *Gata3*<sup>En1cko</sup> brains. Consistent with the phenotypes of *Gata2*<sup>En1cko</sup> embryos at E12.5, we detected loss of most serotonergic markers, including 5-HT, *Tph2* and *Sert* in *Gata2*<sup>En1cko</sup> mutants at E18.5 (Fig. 7D,E,M,N; data not shown). By including a Cre-recombinase-based midbrain-r1 cell lineage reporter *ROSA26*<sup>mT-mG</sup> (*En1*<sup>Cre/+</sup>; *Gata2*<sup>flox/flox</sup>; *ROSA26*<sup>mT-mG/+</sup>) we showed that the loss of the serotonergic neuron markers in the *Gata2*<sup>En1cko</sup> mutants was complete and specific to the dorsal and median raphe serotonergic neuron populations (Fig. S10A,B), earlier shown to be derived from the r1 (Jensen et al., 2008). In E18.5 *Gata3*<sup>En1cko</sup> mutants, again reflecting their E12.5 phenotype, we detected decreased numbers of 5-HT-, *Sert*- and *Tph2*-positive serotonergic neurons, including both *Sert*<sup>+</sup> and *Sert*<sup>+</sup>*Vglut3*<sup>+</sup> subtypes in different regions of the dorsal raphe (Fig. 8A-F,J-M; Fig. S11). Interestingly, despite the loss of *Tph2* and *Sert* expression, we still detected abundant *Vglut3* expression in the central part of the dorsal raphe (Fig. 8G-K; Fig. S11).

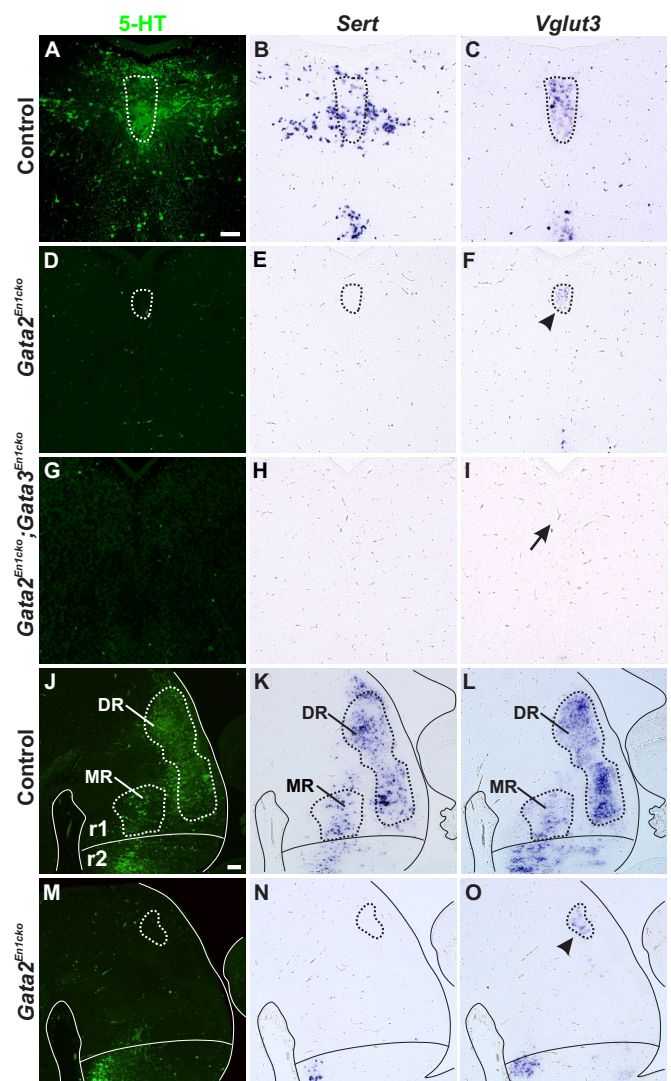

**Fig. 7. Development of dorsal and median raphe neurons in *Gata2*<sup>En1cko</sup> and *Gata2*<sup>En1cko</sup>; *Gata3*<sup>En1cko</sup>.** Coronal (A-I; see Fig. S2P for the sectioning plane) and sagittal (J-O) sections of E18.5 embryos. (A,D,G,J,M) 5-HT IHC. (B,E,H,K,N) *Sert* ISH. (C,F,I,L,O) *Vglut3* ISH. Arrowheads in F,O indicate *Vglut3*<sup>+</sup> cells in *Gata2*<sup>En1cko</sup>. Arrow in I shows loss of *Vglut3*<sup>+</sup> cells in *Gata2*<sup>En1cko</sup>; *Gata3*<sup>En1cko</sup>. Dotted lines indicate *Vglut3* expression area on parallel sections. The r1-r2 boundary is indicated by a horizontal line in J-O. DR, dorsal raphe; MR, median raphe. Scale bars: 100 μm.

Thus, our loss-of-function analyses demonstrated differential requirements for *Gata2* and *Gata3* for the activation of genes defining serotonergic neuron identity. These differences also correlated with the expression levels of *Gata2* and *Gata3* in the *Vglut3*<sup>+</sup> and *Sert*<sup>+</sup> serotonergic neuron subgroups early in the development.

### *Gata2* and *Gata3* cooperatively regulate the development of the r1-derived dorsal raphe glutamatergic neurons

Previous studies have shown that the dorsal raphe contains both serotonergic and non-serotonergic *Vglut3*<sup>+</sup> cells. Our analyses showed that the expression of *Vglut3* was largely abolished in the *Gata2*<sup>En1cko</sup> mutants, but it seemed unaffected in *Gata3*<sup>En1cko</sup> embryos (Fig. 7F,O; Fig. 8H,I). Interestingly, however, we detected a spared *Vglut3*-expressing neuronal population in a central region of the dorsal raphe in the *Gata2*<sup>En1cko</sup> mutants (Fig. 7F,O). These *Vglut3*<sup>+</sup> neurons were devoid of 5-HT and thus might correspond to the recently identified



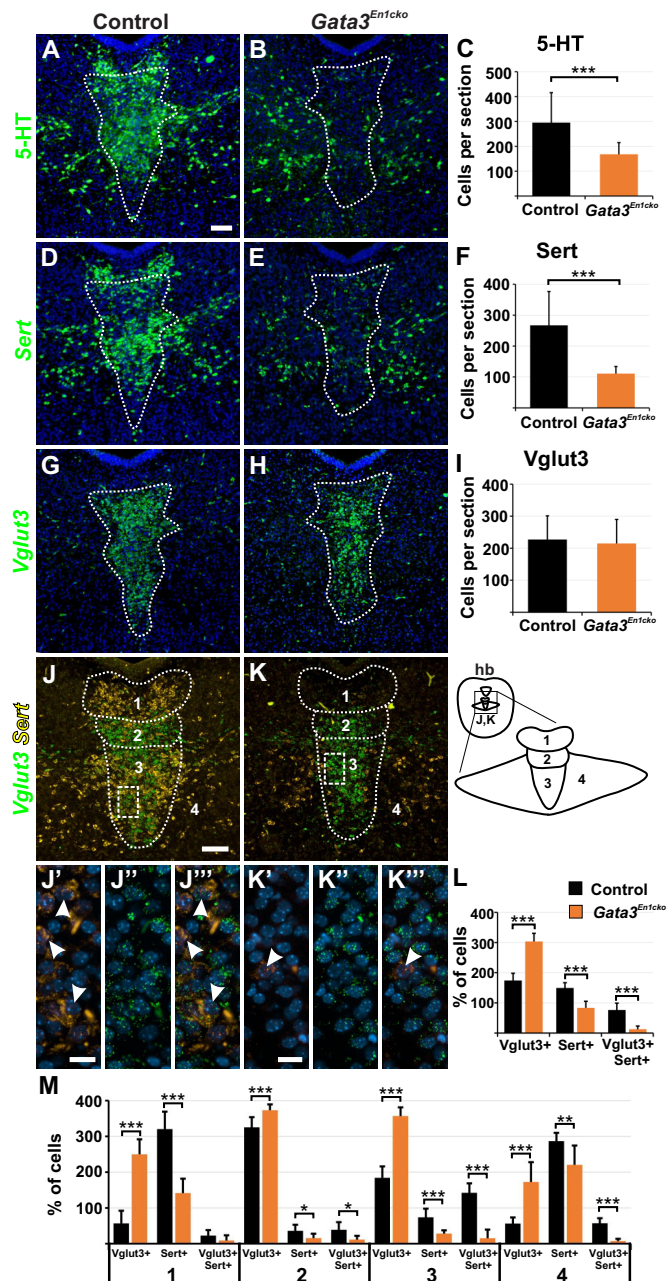

**Fig. 8. Development of dorsal and median raphe neuron subgroups in *Gata3<sup>En1cko</sup>*.** (A–K<sup>m</sup>) Coronal sections of E18.5 embryos. (A,B) 5-HT IHC. (D,E) *Sert* ISH. (G,H) *Vglut3* ISH. (J,K) Combined *Vglut3* and *Sert* ISH; boxed areas are shown at higher magnification in J'–J<sup>m</sup>, K'–K<sup>m</sup>. Arrowheads mark *Sert*<sup>+</sup> cells. (C,F,I) Quantification of 5-HT<sup>+</sup>, *Sert*<sup>+</sup> and *Vglut3*<sup>+</sup> cells in control and *Gata3<sup>En1cko</sup>* embryos. (L,M) Relative amounts of *Sert*<sup>+</sup>, *Vglut3*<sup>+</sup> and *Vglut3*<sup>+</sup>*Sert*<sup>+</sup> cells in the whole dorsal raphe (L) and in four regions of dorsal raphe (M) at E18.5. Regions are indicated in the schematic and in J,K. Bars represent means ± s.d. \**P* < 0.05, \*\**P* < 0.01, \*\*\**P* < 0.001 (two-tailed Student's *t*-test). Dotted lines in A,B,D,E,G,H indicate *Vglut3* expression area on parallel sections. hb, hindbrain. Scale bars: 20 μm (J',K'); 100 μm (A).

*Vglut3*<sup>+</sup> dorsal raphe glutamatergic neuron subgroup projecting to the VTA (Hioki et al., 2010; Liu et al., 2014; McDevitt et al., 2014; Qi et al., 2014). The spared *Vglut3*<sup>+</sup> cells first appeared in the ventral r1 of the *Gata2<sup>En1cko</sup>* embryos at E14.5 (data not shown) and may thus represent a relatively late-born subgroup. To investigate when the *Vglut3*<sup>+</sup> glutamatergic neurons are born, we administered 5-ethynyl-2'-deoxyuridine (EdU) to pregnant females at E10.5, E11.5, E12.5 or

E13.5, and analysed the dorsal raphe of wild-type and *Gata2<sup>En1cko</sup>* embryos at E18.5. The majority of the 5-HT<sup>+</sup> and *Vglut3*<sup>+</sup> neurons in the dorsal raphe of wild-type embryos were labelled when EdU was given at E10.5, whereas only few of the 5-HT<sup>+</sup> cells were labelled when EdU was given at the later stages (Fig. 9B,D,G; Fig. S12B,D; data not shown), consistent with earlier reports (Jacob et al., 2007). In contrast to the 5-HT<sup>+</sup> neurons, some *Vglut3*<sup>+</sup> glutamatergic neurons in the central dorsal raphe of both wild-type and *Gata2<sup>En1cko</sup>* embryos were labelled when EdU was administered at E11.5, E12.5, but not any when given at E13.5 (Fig. 9A,C,E–G; Fig. S12A,C; data not shown). This suggests that, in the dorsal raphe, the *Vglut3*<sup>+</sup> glutamatergic neurons are born later than serotonergic neurons, and many of them exit the cell cycle only after E12.5 (Fig. 9G).

Next, using Cre-recombinase-based fate mapping, we studied the developmental origin of the *Vglut3*<sup>+</sup> glutamatergic neurons. The whole dorsal raphe area was efficiently labelled in E18.5 *En1<sup>Cre/+</sup>; ROSA26<sup>TdTomato/+</sup>* brains, suggesting that the *Vglut3*<sup>+</sup> population is not derived from posterior rhombomeres (Fig. S10C–E). To gain insights into the origin of the *Vglut3*<sup>+</sup> glutamatergic neurons within the r1 and their lineage relationship with the dorsal raphe serotonergic neurons, we analysed the pattern of Cre-mediated recombination in the dorsal raphe of E18.5 *Nkx2-2<sup>Cre/+</sup>; ROSA26<sup>TdTomato/+</sup>* embryos. In addition to the dorsal raphe serotonergic neurons, the centrally located *Vglut3*<sup>+</sup> population was also efficiently labelled (Fig. 10A–C). Interestingly, although these *Vglut3*<sup>+</sup> cells were negative for the serotonergic marker 5-HT, they still expressed *Pet1* (Fig. 10D–F). However, the level of *Pet1* expression was lower in the *Vglut3*<sup>+</sup> glutamatergic neurons compared with the adjacent serotonergic cells (Fig. 10D,F,G). These results suggest that, similar to the serotonergic neurons, the *Vglut3*<sup>+</sup> glutamatergic neurons in the central dorsal raphe are derived from *Nkx2-2*<sup>+</sup> progenitors in the ventral r1.

Finally, as the dorsal raphe glutamatergic neurons share lineage with the r1-derived serotonergic neurons, and yet were spared in both *Gata2<sup>En1cko</sup>* and *Gata3<sup>En1cko</sup>* brains, we addressed the possibility of redundancy between the Gata TFs for the development of these cells. Supporting this, we detected no *Vglut3* expression in *Gata2<sup>En1cko</sup>; Gata3<sup>En1cko</sup>* double mutants (*En1<sup>Cre/+</sup>; Gata2<sup>lox/lox</sup>; Gata3<sup>lox/lox</sup>*) (Fig. 7I). Altogether, our results show that differentiation of both serotonergic and glutamatergic neurons of the dorsal raphe is regulated by Gata2 and Gata3, but relative differences in the requirements for these factors may delineate distinct neuronal subgroups.

## DISCUSSION

Considering the multifaceted functions of the serotonergic system, a substantial level of heterogeneity can be expected in its cellular composition. Knowledge of the mechanisms guiding serotonergic neuron differentiation should lead to a better understanding of the serotonergic cell types. We mapped the neural progenitor domains and their derivatives in the ventral r1, a region producing dorsal and median raphe serotonergic neurons. We studied how the cell types in the dorsal raphe are affected by the loss of function of the TFs Gata2 and Gata3, revealing an early heterogeneity among serotonergic neuron precursors, both in their molecular composition and in developmental regulatory mechanisms. We also provide information on the development of the dorsal raphe glutamatergic neurons, recently associated with brain reward circuitries.

### Molecular diversity within the *Nkx2-2*-expressing neural progenitors in the ventral r1

Serotonergic neurons are generated from a narrow *Nkx2-2*<sup>+</sup> ventral neuroepithelial domain (Briscoe et al., 1999), yet *Nkx2-2* is required for serotonergic neuron development only in the posterior hindbrain

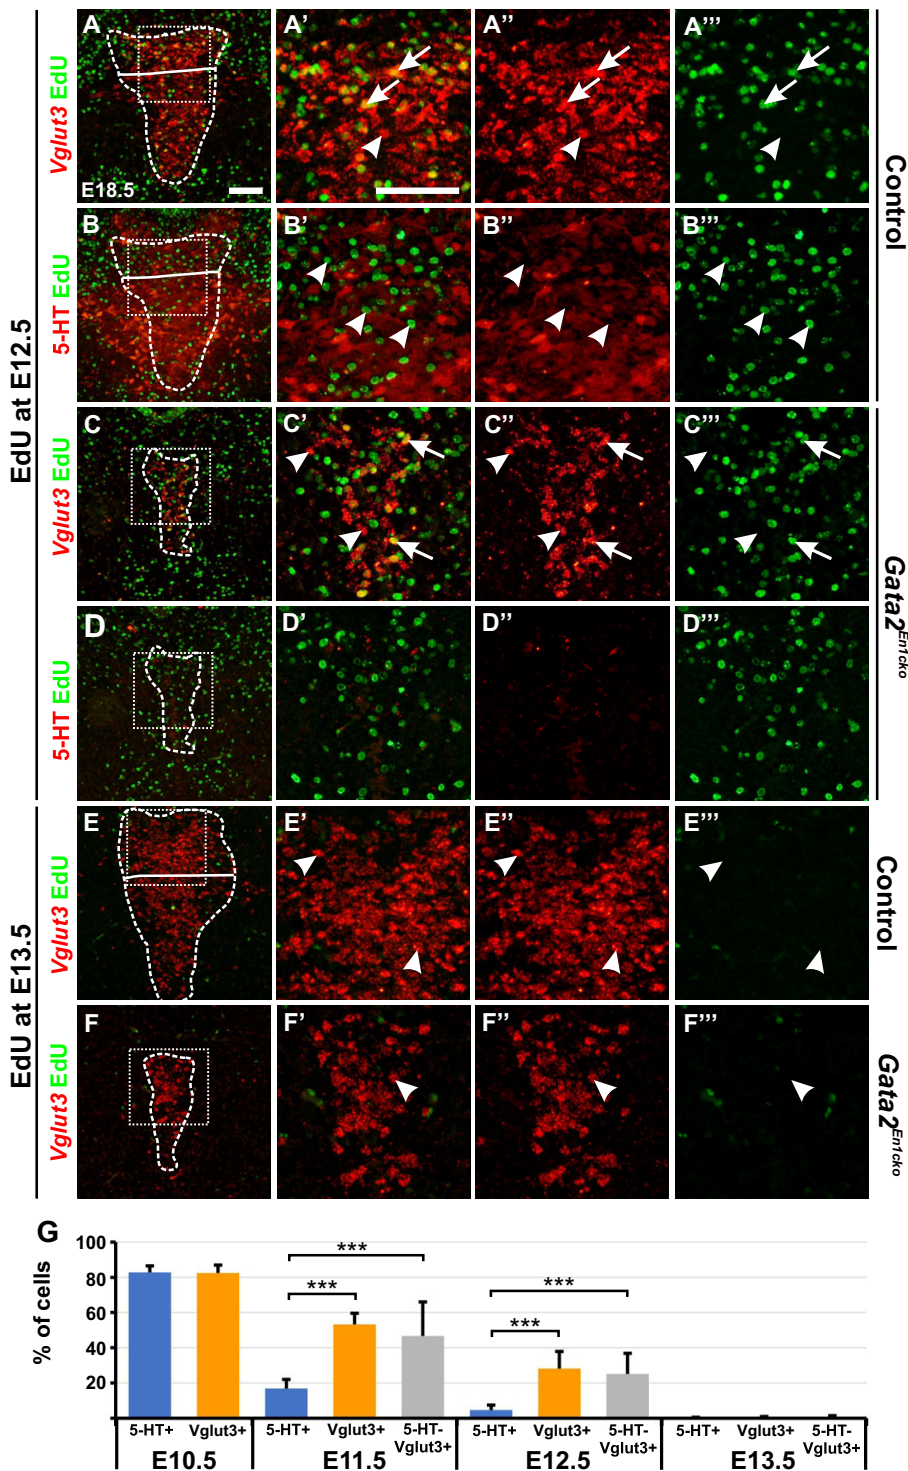

**Fig. 9. Birth-dating of serotonergic and *Vglut3*<sup>+</sup> glutamatergic neurons in the dorsal raphe.** (A-F'') *Vglut3* ISH with EdU (A-A'', C-C'', E-F'') and 5-HT IHC with EdU (B-B'', D-D'') in the dorsal raphe of E18.5 control and *Gata2*<sup>En1cko</sup> embryos labelled with EdU at E12.5 or E13.5; boxed areas shown at higher magnification in A'-F'''. Dashed lines indicate the area of *Vglut3* expression, continuous lines mark the border of the region containing cells expressing *Vglut3* but not 5-HT. Arrows indicate cells that are labelled with EdU and express 5-HT or *Vglut3*. Arrowheads mark EdU-negative cells. (G) Proportion of 5-HT<sup>+</sup>, *Vglut3*<sup>+</sup> and 5-HT<sup>-</sup>*Vglut3*<sup>+</sup> cells in the dorsal raphe, when EdU was given E10.5, E11.5, E12.5 and E13.5. Bars represent mean±s.d. \*\*\*P<0.001 (two-tailed Student's *t*-test). Scale bars: 100 μm.

and not in the r1. A possible explanation for this is functional redundancy of *Nkx2-2* with a related TF, *Nkx2-9* (Deneris and Wyler, 2012). However, although our results confirm that *Nkx2-9* is co-expressed with *Nkx2-2* in the ventral r1, *Nkx2-9* expression does not coincide with the region producing serotonergic neurons. Rather, *Nkx2-9* marks a more dorsal domain adjacent to newly born oligodendrocytes. Thus, the *Nkx2-2*-expressing neuroepithelium could be subdivided into a dorsal domain producing oligodendrocytes (rpvMN) and a ventral domain producing serotonergic neurons (rp3) (Fig. 11A). We also show that two other

homeodomain TFs, *Nkx6-1* and *Nkx6-2* are expressed in the mouse rp3, consistent with earlier reports of *Nkx6-1* expression in chicken serotonergic progenitors (Craven et al., 2004). In the mouse rp3, both *Nkx6-1* and *Nkx6-2* are expressed in a dorsoventral gradient. These observations reveal molecular heterogeneity among rp3 progenitors and suggest that they may be further divided into distinct subgroups.

**Gata2 as a serotonergic neuron terminal selector TF**

Following neuroepithelial patterning, neuron type-specific gene expression is initiated by terminal selector TFs that are expressed



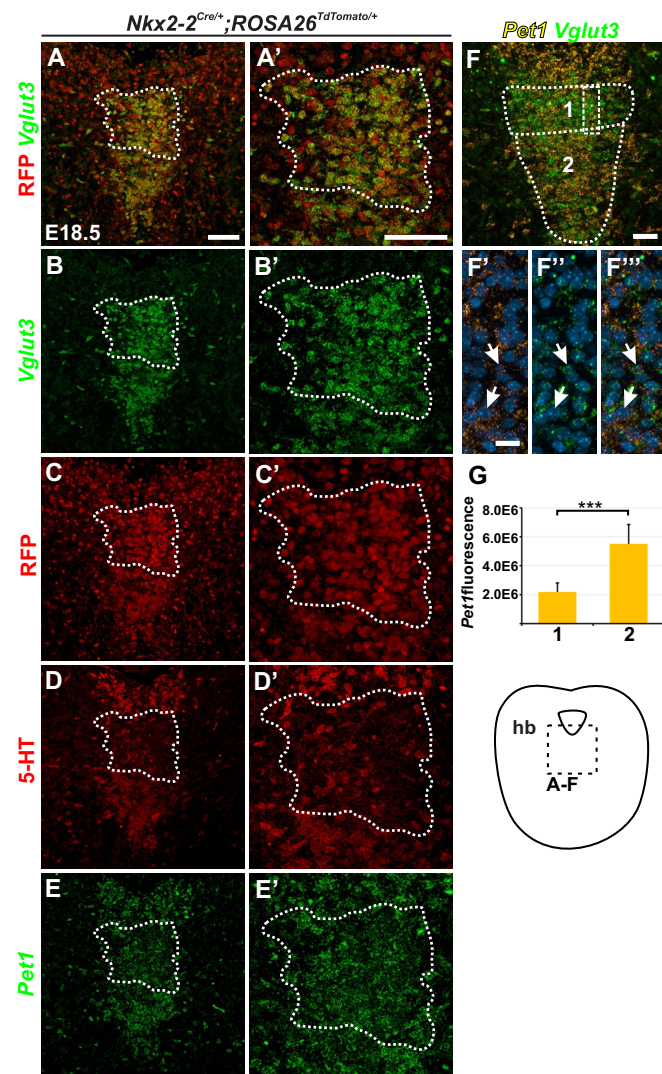

**Fig. 10. Developmental origins of *Vglut3*<sup>+</sup> dorsal raphe glutamatergic neurons.** (A–E') Coronal sections of the dorsal raphe of E18.5 *Nkx2-2*<sup>Cre/+</sup>; *ROSA26*<sup>TdTomato/+</sup> embryo. (A–C') *Vglut3* ISH with RFP IHC; boxed areas shown at higher magnification in A'–C'. (D, D') 5-HT IHC on an adjacent section; boxed area shown at higher magnification in D'. (E, E') *Pet1* fluorescent ISH; boxed area shown at higher magnification in E'. Dotted line marks *Vglut3*<sup>+</sup>5-HT<sup>−</sup> area. (F) Combined *Pet1* and *Vglut3* ISH in E18.5 wild-type dorsal raphe; boxed areas shown at higher magnification in F'–F'''. Arrows indicate double-positive cells. (G) Quantification of the *Pet1* ISH signal in the *Vglut3*<sup>+</sup>5-HT<sup>−</sup> (1) and *Vglut3*<sup>+</sup>5-HT<sup>+</sup> (2) regions (identified on parallel sections, indicated in F). Bars represent mean±s.d. \*\*\**P*<0.001 (two-tailed Student's *t*-test). Schematic indicates the area shown in A–F. hb, hindbrain. Scale bars: 50 μm (F); 100 μm (A, A').

upon cell cycle exit (Hobert, 2011). *Pet1* has been suggested to operate as a terminal selector of the serotonergic neurons as it is thought to be specific for the serotonergic lineage and directly regulates genes belonging to the serotonergic gene battery. However, *Pet1* is not absolutely required for serotonergic neuron development and *Pet1*-deficient neural precursors are not known to be redirected to an alternative fate (Deneris and Wyler, 2012).

Our results suggest that *Gata2* fulfils many criteria for a terminal selector during early neuronal differentiation of serotonergic neurons. *Gata2* is activated upon cell cycle exit and without *Gata2* function there is a complete loss of serotonergic identity and appearance of cells with alternative phenotypes. In addition, we

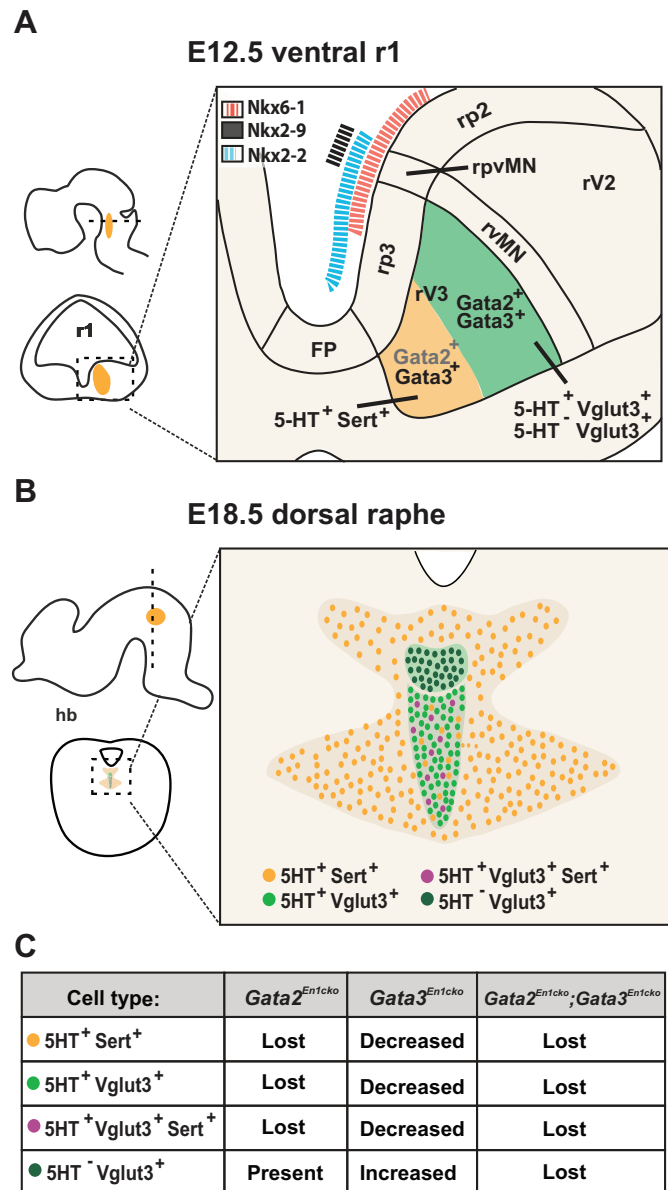

**Fig. 11. Model of development and neuronal diversity in the dorsal raphe.** (A) Development of different cell types from the *Nkx2-2*-positive progenitor domain in the embryonic ventral r1. Coloured bars mark the expression of *Nkx2-2*, *Nkx2-9* and *Nkx6-1* in the ventricular zone progenitors, which give rise to precursors with differences in the expression of *Gata2/3* selector TFs and neuronal subtype markers. (B, C) Neuronal diversity in the dorsal raphe at E18.5 (B) and dependency of different neuron subgroups on *Gata2* and *Gata3* (C). FP, floor plate; hb, hindbrain; rV2,3, rhombencephalic V2, V3 precursor domain.

show that *Gata2* is required for the activation of the closely related TF *Gata3* in the serotonergic precursors. This is in contrast to the commonly held view of independent activation of *Gata2* and *Gata3* during serotonergic differentiation (Deneris and Wyler, 2012), which is apparently due to the expression of *Gata3* in the neighbouring GABAergic precursors (Kala et al., 2009; Achim et al., 2012). The expression of *Gata3* continues in the adult serotonergic neurons and *Gata3* contributes to the maintenance of some of the serotonergic neuron-specific genes (Liu et al., 2010). Thus, the serotonergic terminal selector function may be viewed as a sequential and joint activity of a TF network including *Gata2*, *Gata3*, *Lmx1b* and *Pet1*.

The combinatorial code for postmitotic neuronal fate selection is also suggested by the context dependence of Gata2 function. When overexpressed, Gata2 can induce serotonergic fate only in the r1 (Craven et al., 2004). However, Gata2 can operate as a selector of other neuronal identities depending on the brain region (Kala et al., 2009; Virolainen et al., 2012). These separate functions could be, at least partly, due to distinct Gata co-factors expressed in postmitotic GABAergic and serotonergic neuron precursors (Lahti et al., 2016). The ectopic neurons observed in the ventral r1 of the *Gata2<sup>En1cko</sup>* mutants could reflect neurons also produced in the wild-type r1, but at an earlier time point in development. However, their exact identity remains unknown.

### Generation of neuronal diversity in the dorsal raphe

One of the differences between the serotonergic neurons is the expression of co-neurotransmitters, such as glutamate. We show that in the dorsal raphe, most of the medial serotonergic neurons are *Vglut3<sup>+</sup>* and some of these also express *Sert* (see below), whereas the lateral neurons do not express *Vglut3* but are *Sert<sup>+</sup>*. This is in contrast to earlier studies, in which *Vglut3* and *Sert* expression was reported to largely colocalise (Gras et al., 2002), although a later study showed that *Vglut3* and *Sert* are detected in distinct nerve terminals in the forebrain (Amilhon et al., 2010).

Our results suggest that the early precursors for *Vglut3<sup>+</sup>* and *Sert<sup>+</sup>* serotonergic neurons are spatially distinct and can be characterised by different expression and function of Gata2 and Gata3. During neurogenesis, both dorsal *Vglut3<sup>+</sup>* and ventral *Sert<sup>+</sup>* precursors require Gata2, whereas Gata3 is needed for differentiation of ventral *Sert<sup>+</sup>* precursors. However, in addition to differentiation of the *Sert<sup>+</sup>* neurons, Gata3 appears to be important for the full serotonergic identity of the *Vglut3<sup>+</sup>* neurons (see below). Thus, distinct serotonergic precursor populations diverge soon after cell cycle exit and show differences in their requirements for terminal selector TFs (Fig. 11A). Our results suggest that the *Vglut3<sup>+</sup>* cells produced from the more dorsal *Nkx2-2<sup>+</sup>* domain finally assume a central position in the dorsal raphe complex. Similar dorsolateral-to-medial rearrangement has been reported during development of the midbrain dopaminergic complex (Panman et al., 2014).

Later, neurons expressing both *Vglut3* and *Sert* were observed in the central part of the dorsal raphe. Currently, it is difficult to establish whether these neurons are derived from *Vglut3* or *Sert* single-positive precursors. Similar to our observations, a recent expression profiling of serotonergic neuron subtypes revealed r2-derived populations of *Vglut3<sup>low</sup>*, *Tph2/Sert<sup>high</sup>* and *Vglut3<sup>high</sup>*, *Tph2/Sert<sup>low</sup>* cells in the median raphe, although this anti-correlation between *Vglut3* and *Tph2* was not detected in the r1-derived neurons (Okaty et al., 2015).

In addition to the serotonergic neurons, the dorsal raphe contains non-serotonergic *Vglut3<sup>+</sup>* glutamatergic neurons in its central subregion ('shell region' of the dorsal part) (Hioki et al., 2010) (Fig. 11B). Our results show that these *Vglut3<sup>+</sup>* glutamatergic neurons are developmentally related to the serotonergic neurons, as both of them have their origin in the *Nkx2-2<sup>+</sup>* progenitors and differentiation of both of these neuronal populations is dependent on Gata factors. Based on their EdU labelling and late appearance in the *Gata2<sup>En1cko</sup>* mutants, the *Vglut3<sup>+</sup>* glutamatergic neurons appear to exit the cell cycle later than the serotonergic neurons. *Vglut3<sup>+</sup>* glutamatergic neurons also express *Pet1*, further supporting their developmental relationship with the serotonergic neurons. The precursors for *Vglut3<sup>+</sup>* serotonergic and glutamatergic neurons also show differences: the *Vglut3<sup>+</sup>* glutamatergic neurons express *Pet1* at a lower level and are completely lost only when both *Gata2* and

*Gata3* are inactivated (Fig. 11C). Interestingly, in the *Gata3<sup>En1cko</sup>* single mutants, the dorsal raphe serotonergic neurons assume a molecular phenotype reminiscent of the *Vglut3<sup>+</sup>* glutamatergic neurons, suggesting that the level/composition of the Gata selector complex distinguishes the fate of these neuronal subtypes. Further testing of this hypothesis would require unique markers for these neurons.

### Conclusions and perspective

Our results suggest that a major choice in the serotonergic neuron subtype identity is established at the birth of these neurons. It is likely that this heterogeneity stems from differences in the regional characteristics of the serotonergic neuron progenitors modulating the activation and activity of the terminal selector TFs. The subtypes of serotonergic neurons are interesting from the perspective of behaviour and psychiatric disease. *Vglut3*-expressing serotonergic and glutamatergic neurons innervate dopaminergic neurons in the VTA and are important for reward signalling (Liu et al., 2014; McDevitt et al., 2014; Qi et al., 2014). *Sert* is the target of selective serotonin reuptake inhibitors (SSRIs), the commonly used antidepressants. Unlike drugs affecting the dopaminergic pathways, SSRIs do not cause dependence. This might be partly due to *Sert*- and *Vglut3*-expressing neurons being largely distinct neuronal subgroups with unique functions.

### MATERIALS AND METHODS

#### Mice

*En1<sup>Cre</sup>* (Kimmel et al., 2000), *Gata2<sup>fllox</sup>* (Haugas et al., 2010), *Gata3<sup>fllox</sup>* (Grote et al., 2008), *ROSA26<sup>GM-T-mG</sup>* (Muzumdar et al., 2007), *ROSA26<sup>TdTomato</sup>* (Madisen et al., 2010) and *Nkx2-2<sup>Cre</sup>* (Balderes et al., 2013) alleles were on an outbred (ICR) background. Embryos were embedded in paraffin and sectioned at 5 µm. All analyses were confirmed using at least three biological replicates. Experiments were approved by the Laboratory Animal Centre, University of Helsinki, and the National Animal Experiment Board in Finland.

#### In situ mRNA hybridisation and immunohistochemistry

For *in situ* mRNA hybridisation (ISH), digoxigenin (DIG)-labelled antisense cRNA probes were used. For combined ISH and immunohistochemistry (IHC), the TSA Fluorescence Palette System (PerkinElmer) was used to visualise ISH signal and additional primary antibodies were added. For double ISH, DIG and fluorescein-labelled probes were used. Antibodies are listed in Table S1 and mRNA ISH probes in Table S2.

#### EdU labelling

ICR and *Gata2<sup>fllox/fllox</sup>* females mated with *En1<sup>Cre/+</sup>;Gata2<sup>fllox</sup>* males were injected with EdU (10 mg/kg) at E10.5, E11.5, E12.5 or E13.5. EdU injections were carried out six times at 2 h intervals starting at noon and embryos were analysed at E18.5. EdU<sup>+</sup> nuclei were visualised using the Click-iT EdU Alexa Fluor 488 or 555 Imaging Kit (Thermo Fisher Scientific).

#### mRNA expression profiling by cDNA microarray

Ventral r1 containing the whole basal plate region was dissected from E12.5 wild-type and *Gata2<sup>En1cko</sup>* embryos. For both genotypes, three groups were generated, each consisting of six tissue samples. Total RNA was extracted with TriZol reagent and used for probe labelling. Illumina BeadChip (Mouse WG-6 2.0) microarrays were hybridised according to the manufacturer's protocol. The data set was normalised using the quantile normalisation method. Statistical testing was performed using the limma package from R and Bioconductor statistical analysis software.

#### Microscopy and statistical analysis

Images were taken with an Olympus AX70 microscope with Olympus DP70 camera, a Zeiss Axio Imager.M2 microscope with AxioCam HRC camera or



Zeiss Axio Imager.M2 with Hamamatsu Orca-Flash 4.0 V2 camera. For quantification, positive cells were counted manually from sections (at least eight sections per embryo). ImageJ 1.50i was used to measure the *Pet1* ISH fluorescence (McCloy et al., 2014). Two-tailed Student's *t*-test was used for statistical analysis (\**P*<0.05, \*\**P*<0.01, \*\*\**P*<0.001).

#### Acknowledgements

We thank Francesca Morello, Laura Knaapi, Outi Kostia and Eija Koivunen for expert technical assistance. We thank Meinhard Busslinger for the *Gata3<sup>fllox</sup>*, Wolfgang Wurst for the *En1<sup>Cre</sup>* and Lori Sussel for the *Nkx2-2<sup>Cre</sup>* mice. We acknowledge the DNA Microarray Centre at Turku Centre for Biotechnology and Daniel Borshagovski for the help in gene expression profiling and data analyses.

#### Competing interests

The authors declare no competing or financial interests.

#### Author contributions

J.P. and M.S. conceived and supervised the project. M.H. and L.T. designed and performed experiments and analyzed data. K.A. carried out the microarray experiments. All the authors contributed to writing of the manuscript.

#### Funding

This work was supported by the University of Helsinki (Helsingin Yliopisto) (M.H.); the Sigrid Jusélius Foundation (Sigrid Juséliuksen Säätiö) (M.S., J.P.); the Otto A. Malm foundation (L.T.); the Center for International Mobility (Kansainvälisen Liikkuvuuden ja Yhteistyön Keskus) (L.T.); the Integrative Life Sciences doctoral program of the University of Helsinki (L.T.); the Jane and Aatos Erkko Foundation (Jane ja Aatos Erkon Säätiö) (J.P.); and the Academy of Finland (Suomen Akatemia) (J.P.).

#### Data availability

Microarray data have been deposited in NCBI's Gene Expression Omnibus under accession number GSE89354 (<http://www.ncbi.nlm.nih.gov/geo/query/acc.cgi?acc=GSE89354>).

#### Supplementary information

Supplementary information available online at <http://dev.biologists.org/lookup/doi/10.1242/dev.136614.supplemental>

#### References

- Achim, K., Peltopuro, P., Lahti, L., Li, J., Salminen, M. and Partanen, J. (2012). Distinct developmental origins and regulatory mechanisms for GABAergic neurons associated with dopaminergic nuclei in the ventral mesodiencephalic region. *Development* **139**, 2360–2370.
- Alonso, A., Merchán, P., Sandoval, J. E., Sánchez-Arrones, L., García-Cazorla, A., Artuch, R., Ferrán, J. L., Martínez-de-la-Torre, M. and Puelles, L. (2013). Development of the serotonergic cells in murine raphe nuclei and their relations with rhombomeric domains. *Brain Struct. Funct.* **218**, 1229–1277.
- Amihon, B., Lepicard, E., Renoir, T., Mongeau, R., Popa, D., Poirel, O., Miot, S., Gras, C., Gardier, A. M., Gallego, J. et al. (2010). VGLUT3 (vesicular glutamate transporter type 3) contribution to the regulation of serotonergic transmission and anxiety. *J. Neurosci.* **30**, 2198–2210.
- Balderes, D. A., Magnuson, M. A. and Sussel, L. (2013). *Nkx2.2:Cre* knock-in mouse line: a novel tool for pancreas- and CNS-specific gene deletion. *Genesis* **51**, 844–851.
- Bresnick, E. H., Lee, H.-Y., Fujiwara, T., Johnson, K. D. and Keles, S. (2010). GATA switches as developmental drivers. *J. Biol. Chem.* **285**, 31087–31093.
- Briscoe, J., Sussel, L., Serup, P., Hartigan-O'Connor, D., Jessell, T. M., Rubenstein, J. L. and Ericson, J. (1999). Homeobox gene *Nkx2.2* and specification of neuronal identity by graded Sonic hedgehog signalling. *Nature* **398**, 622–627.
- Briscoe, J., Pierani, A., Jessell, T. M. and Ericson, J. (2000). A homeodomain protein code specifies progenitor cell identity and neuronal fate in the ventral neural tube. *Cell* **101**, 435–445.
- Calizo, L. H., Akanwa, A., Ma, X., Pan, Y.-Z., Lemos, J. C., Craig, C., Heemstra, L. A. and Beck, S. G. (2011). Raphe serotonin neurons are not homogenous: electrophysiological, morphological and neurochemical evidence. *Neuropharmacology* **61**, 524–543.
- Cheng, L., Chen, C. L., Luo, P., Tan, M., Qiu, M., Johnson, R. and Ma, Q. (2003). *Lmx1b*, *Pet-1*, and *Nkx2.2* coordinately specify serotonergic neurotransmitter phenotype. *J. Neurosci.* **23**, 9961–9967.
- Cordes, S. P. (2005). Molecular genetics of the early development of hindbrain serotonergic neurons. *Clin. Genet.* **68**, 487–494.
- Craven, S. E., Lim, K. C., Ye, W., Engel, J. D., de Sauvage, F. and Rosenthal, A. (2004). *Gata2* specifies serotonergic neurons downstream of sonic hedgehog. *Development* **131**, 1165–1173.
- Crawford, L. K., Craig, C. P. and Beck, S. G. (2010). Increased intrinsic excitability of lateral wing serotonin neurons of the dorsal raphe: a mechanism for selective activation in stress circuits. *J. Neurophysiol.* **103**, 2652–2663.
- Dahlstroem, A. and Fuxe, K. (1964). Evidence for the existence of monoamine-containing neurons in the central nervous system. I. Demonstration of monoamines in the cell bodies of brain stem neurons. *Acta Physiol. Scand. Suppl. Suppl.* **232**, 1–55.
- Deneris, E. S. and Wyler, S. C. (2012). Serotonergic transcriptional networks and potential importance to mental health. *Nat. Neurosci.* **15**, 519–527.
- Ding, Y.-Q., Marklund, U., Yuan, W., Yin, J., Wegman, L., Ericson, J., Deneris, E., Johnson, R. L. and Chen, Z. F. (2003). *Lmx1b* is essential for the development of serotonergic neurons. *Nat. Neurosci.* **6**, 933–938.
- Fu, W., Le Maître, E., Fabre, V., Bernard, J.-F., David Xu, Z.-Q. and Hökfelt, T. (2010). Chemical neuroanatomy of the dorsal raphe nucleus and adjacent structures of the mouse brain. *J. Comp. Neurol.* **518**, 3464–3494.
- Gras, C., Herzog, E., Bellenchi, G. C., Bernard, V., Ravassard, P., Pohl, M., Gasnier, B., Giros, B. and El Mestikawy, S. (2002). A third vesicular glutamate transporter expressed by cholinergic and serotonergic neurons. *J. Neurosci.* **22**, 5442–5451.
- Grote, D., Boualia, S. K., Souabni, A., Merkel, C., Chi, X., Costantini, F., Carroll, T. and Bouchard, M. (2008). *Gata3* acts downstream of beta-catenin signaling to prevent ectopic metanephric kidney induction. *PLoS Genet.* **4**, e1000316.
- Haugas, M., Lilleväli, K., Hakanen, J. and Salminen, M. (2010). *Gata2* is required for the development of inner ear semicircular ducts and the surrounding perilymphatic space. *Dev. Dyn.* **239**, 2452–2469.
- Hendricks, T., Francis, N., Fyodorov, D. and Deneris, E. S. (1999). The ETS domain factor *Pet-1* is an early and precise marker of central serotonin neurons and interacts with a conserved element in serotonergic genes. *J. Neurosci.* **19**, 10348–10356.
- Hendricks, T. J., Fyodorov, D. V., Wegman, L. J., Lelutiu, N. B., Pehek, E. A., Yamamoto, B., Silver, J., Weeber, E. J., Sweatt, J. D. and Deneris, E. S. (2003). *Pet-1* ETS gene plays a critical role in 5-HT neuron development and is required for normal anxiety-like and aggressive behavior. *Neuron* **37**, 233–247.
- Hioki, H., Nakamura, H., Ma, Y.-F., Konno, M., Hayakawa, T., Nakamura, K. C., Fujiyama, F. and Kaneko, T. (2010). Vesicular glutamate transporter 3-expressing nonserotonergic projection neurons constitute a subregion in the rat midbrain raphe nuclei. *J. Comp. Neurol.* **518**, 668–686.
- Hobert, O. (2011). Regulation of terminal differentiation programs in the nervous system. *Annu. Rev. Cell Dev. Biol.* **27**, 681–696.
- Jacob, J., Ferri, A. L., Milton, C., Prin, F., Pla, P., Lin, W., Gavalas, A., Ang, S.-L. and Briscoe, J. (2007). Transcriptional repression coordinates the temporal switch from motor to serotonergic neurogenesis. *Nat. Neurosci.* **10**, 1433–1439.
- Jacob, J., Storm, R., Castro, D. S., Milton, C., Pla, P., Guillemot, F., Birchmeier, C. and Briscoe, J. (2009). *Insm1* (IA-1) is an essential component of the regulatory network that specifies monoaminergic neuronal phenotypes in the vertebrate hindbrain. *Development* **136**, 2477–2485.
- Jensen, P., Farago, A. F., Awatramani, R. B., Scott, M. M., Deneris, E. S. and Dymecki, S. M. (2008). Redefining the serotonergic system by genetic lineage. *Nat. Neurosci.* **11**, 417–419.
- Kala, K., Haugas, M., Lilleväli, K., Guimera, J., Wurst, W., Salminen, M. and Partanen, J. (2009). *Gata2* is a tissue-specific post-mitotic selector gene for midbrain GABAergic neurons. *Development* **136**, 253–262.
- Kimmel, R. A., Turnbull, D. H., Blanquet, V., Wurst, W., Loomis, C. A. and Joyner, A. L. (2000). Two lineage boundaries coordinate vertebrate apical ectodermal ridge formation. *Genes Dev.* **14**, 1377–1389.
- Kiyasova, V. and Gaspar, P. (2011). Development of raphe serotonin neurons from specification to guidance. *Eur. J. Neurosci.* **34**, 1553–1562.
- Kiyasova, V., Fernandez, S. P., Laine, J., Stankovski, L., Muzerelle, A., Doly, S. and Gaspar, P. (2011). A genetically defined morphologically and functionally unique subset of 5-HT neurons in the mouse raphe nuclei. *J. Neurosci.* **31**, 2756–2768.
- Kiyasova, V., Bonnavion, P., Scotto-Lomassese, S., Fabre, V., Sahly, I., Tronche, F., Deneris, E., Gaspar, P. and Fernandez, S. P. (2013). A subpopulation of serotonergic neurons that do not express the 5-HT1A autoreceptor. *ACS Chem. Neurosci.* **4**, 89–95.
- Kozicz, T., Bittencourt, J. C., May, P. J., Reiner, A., Gamlin, P. D., Palkovits, M., Horn, A. K., Toledo, C. A. and Ryabinin, A. E. (2011). The Edinger-Westphal nucleus: a historical, structural, and functional perspective on a dichotomous terminology. *J. Comp. Neurol.* **519**, 1413–1434.
- Krueger, K. C. and Deneris, E. S. (2008). Serotonergic transcription of human FEV reveals direct GATA factor interactions and fate of *Pet-1*-deficient serotonin neuron precursors. *J. Neurosci.* **28**, 12748–12758.
- Lahti, L., Haugas, M., Tikker, L., Airavaara, M., Voutilainen, M. H., Anttila, J., Kumar, S., Inkinen, C., Salminen, M. and Partanen, J. (2016). Differentiation and molecular heterogeneity of inhibitory and excitatory neurons associated with midbrain dopaminergic nuclei. *Development* **143**, 516–529.
- Liu, C., Maejima, T., Wyler, S. C., Casadesus, G., Herlitze, S. and Deneris, E. S. (2010). *Pet-1* is required across different stages of life to regulate serotonergic function. *Nat. Neurosci.* **13**, 1190–1198.

- Liu, Z., Zhou, J., Li, Y., Hu, F., Lu, Y., Ma, M., Feng, Q., Zhang, J. E., Wang, D., Zeng, J. et al. (2014). Dorsal raphe neurons signal reward through 5-HT and glutamate. *Neuron* **81**, 1360–1374.
- Madisen, L., Zwingman, T. A., Sunkin, S. M., Oh, S. W., Zariwala, H. A., Gu, H., Ng, L. L., Palmiter, R. D., Hawrylycz, M. J., Jones, A. R. et al. (2010). A robust and high-throughput Cre reporting and characterization system for the whole mouse brain. *Nat. Neurosci.* **13**, 133–140.
- Mamounas, L. A., Mullen, C. A., O'Hearn, E. and Molliver, M. E. (1991). Dual serotonergic projections to forebrain in the rat: morphologically distinct 5-HT axon terminals exhibit differential vulnerability to neurotoxic amphetamine derivatives. *J. Comp. Neurol.* **314**, 558–586.
- McCloy, R. A., Rogers, S., Caldon, C. E., Lorca, T., Castro, A. and Burgess, A. (2014). Partial inhibition of Cdk1 in G2 phase overrides the SAC and decouples mitotic events. *Cell Cycle* **13**, 1400–1412.
- McDevitt, R. A., Tiran-Cappello, A., Shen, H., Balderas, I., Britt, J. P., Marino, R. A. M., Chung, S. L., Richie, C. T., Harvey, B. K. and Bonci, A. (2014). Serotonergic versus nonserotonergic dorsal raphe projection neurons: differential participation in reward circuitry. *Cell Rep.* **8**, 1857–1869.
- Muzumdar, M. D., Tasic, B., Miyamichi, K., Li, L. and Luo, L. (2007). A global double-fluorescent Cre reporter mouse. *Genesis* **45**, 593–605.
- Norton, W. H., Mangoli, M., Lele, Z., Pogoda, H. M., Diamond, B., Mercurio, S., Russell, C., Teraoka, H., Stickney, H. L., Rauch, G. J. et al. (2005). *Monorail*/Foxa2 regulates floorplate differentiation and specification of oligodendrocytes, serotonergic raphe neurones and cranial motoneurons. *Development* **132**, 645–658.
- Okaty, B. W., Freret, M. E., Rood, B. D., Brust, R. D., Hennessy, M. L., de Bairos, D., Kim, J. C., Cook, M. N. and Dymecki, S. M. (2015). Multi-scale molecular deconstruction of the serotonin neuron system. *Neuron* **88**, 774–791.
- Panman, L., Papanthou, M., Laguna, A., Oosterveen, T., Volakakis, N., Acampora, D., Kurtsdotter, I., Yoshitake, T., Kehr, J., Joodmardi, E. et al. (2014). Sox6 and Otx2 control the specification of substantia nigra and ventral tegmental area dopamine neurons. *Cell Rep.* **8**, 1018–1025.
- Pattyn, A., Vallstedt, A., Dias, J. M., Samad, O. A., Krumlauf, R., Rijli, F. M., Brunet, J. F. and Ericson, J. (2003). Coordinated temporal and spatial control of motor neuron and serotonergic neuron generation from a common pool of CNS progenitors. *Genes Dev.* **17**, 729–737.
- Pattyn, A., Simplicio, N., van Doorninck, J. H., Goridis, C., Guillemot, F. and Brunet, J. F. (2004). *Ascl1/Mash1* is required for the development of central serotonergic neurons. *Nat. Neurosci.* **7**, 589–595.
- Qi, J., Zhang, S., Wang, H.-L., Wang, H., de Jesus Aceves Buendia, J., Hoffman, A. F., Lupica, C. R., Seal, R. P. and Morales, M. (2014). A glutamatergic reward input from the dorsal raphe to ventral tegmental area dopamine neurons. *Nat. Commun.* **5**, 5390.
- Sego, C., Goncalves, L., Lima, L., Furigo, I. C., Donato, J., Jr and Metzger, M. (2014). Lateral habenula and the rostromedial tegmental nucleus innervate neurochemically distinct subdivisions of the dorsal raphe nucleus in the rat. *J. Comp. Neurol.* **522**, 1454–1484.
- Trokovic, R., Trokovic, N., Hernesniemi, S., Pirvola, U., Vogt Weisenhorn, D. M., Rossant, J., McMahon, A. P., Wurst, W. and Partanen, J. (2003). FGFR1 is independently required in both developing mid- and hindbrain for sustained response to isthmus signals. *EMBO J.* **22**, 1811–1823.
- Vallstedt, A., Klos, J. M. and Ericson, J. (2005). Multiple dorsoventral origins of oligodendrocyte generation in the spinal cord and hindbrain. *Neuron* **45**, 55–67.
- van Doorninck, J. H., van Der Wees, J., Karis, A., Goedknegt, E., Engel, J. D., Coesmans, M., Rutteman, M., Grosveld, F. and De Zeeuw, C. I. (1999). GATA-3 is involved in the development of serotonergic neurons in the caudal raphe nuclei. *J. Neurosci.* **19**, RC12.
- Virolainen, S.-M., Achim, K., Peltopuro, P., Salminen, M. and Partanen, J. (2012). Transcriptional regulatory mechanisms underlying the GABAergic neuron fate in different diencephalic prosomeres. *Development* **139**, 3795–3805.
- Wylie, C. J., Hendricks, T. J., Zhang, B., Wang, L., Lu, P., Leahy, P., Fox, S., Maeno, H. and Deneris, E. S. (2010). Distinct transcriptomes define rostral and caudal serotonin neurons. *J. Neurosci.* **30**, 670–684.
